# Supplementary material for: The singlet excited state of BODIPY promoted aerobic cross-dehydrogenative-coupling reactions under visible light
Source: Royal Society of Chemistry journal article supplement (doi:10.1039/c5cc03421c), 2015-01-01

**Supplementary Information for**  
**Singlet excited state of BODIPY promoted aerobic cross-**  
**dehydrogenative-coupling reactions under visible light**

Xu-Zhe Wang, Qing-Yuan Meng,\* Jian-Ji Zhong, Xue-Wang Gao, Tao Lei, Lei-Min Zhao,  
Zhi-Jun Li, Bin Chen, Chen-Ho Tung, and Li-Zhu Wu\*

Key Laboratory of Photochemical Conversion and Optoelectronic Materials,  
Technical Institute of Physics and Chemistry & University of the Chinese Academy of  
Sciences, Chinese Academy of Sciences, Beijing 100190, P. R. China

*Email: mqy@mail.ipc.ac.cn; lzwu@mail.ipc.ac.cn*

**Table of Contents**

1. Experimental details
2. Characterization data for all compounds
3. NMR Spectra

## 1. Experimental Details

### a) General

$^1\text{H}$  NMR spectra were recorded using a Bruker Avance DPX 400 MHz instrument with tetramethylsilane (TMS) as an internal standard.  $^{13}\text{C}$  NMR spectra were obtained at 100 MHz and referenced to the internal solvent signals. Mass spectra were recorded using a Trio-2000 GC-MS spectrometer. Steady-state emission spectra were recorded using a Perkin–Elmer LS50B spectrofluorimeter. ESR spectra were recorded at room temperature using a Bruker ESP-300E spectrometer at 9.8 GHz, X-band, with 100 Hz field modulation. Samples were quantitatively injected into specially made quartz capillaries for ESR analysis before being purged with air in the dark and illuminated directly in the cavity of the ESR spectrometer with a Nd : YAG laser (532 nm 10 Hz repetition frequency, 10 mJ pulse energy). All reagents were weighed and handled in air unless special explain. Commercially available reagents and solvents were used without further purification. Commercially available reagents and solvents were used without further purification. All the *N*-aryltetrahydroisoquinolines **1** needed for CDC reactions were prepared by using the reported procedure<sup>[1,2]</sup> and purified through column chromatography. Irradiation with withe light was performed using withe LEDs (3W, 350 mA, radiometric power 80 mW).

### b) Synthesis of B-1, B-2 and B-3<sup>[3,4]</sup>

To a solution 2,4-dimethyl-1H-pyrrole (0.19 g, 2 mmol) in DCM was added benzoyl chloride (0.14 g, 1 mmol). Reaction mixture was stirred over night at room temperature. Then add 0.5 mL  $\text{BF}_3\cdot\text{OEt}_2$  and 0.5 mL  $\text{Et}_3\text{N}$  to the reaction system. Reaction mixture was stirred another over night at room temperature. Excess the DCM was removed under vacuum, and the residue was dissolved in ethyl acetate, washed with  $\text{H}_2\text{O}$  and dried over  $\text{Na}_2\text{SO}_4$ . The crude product was purified by flash chromatography (silica gel, eluent: PE/EtOAc = 40/1) to afford **B-1**. Get 0.129 g **B-1**. Yield 40%.  $^1\text{H}$  NMR (400 MHz,  $\text{CDCl}_3$ )  $\delta$  = 7.55 – 7.47 (m, 3H), 7.34 – 7.30 (m, 2H), 6.01 (s, 2H), 2.59 (s, 6H), 1.40 (s, 6H) ppm.

The synthetic method reference reported works. Yields 35 %. **B-2**:  $^1\text{H}$  NMR (400 MHz,  $\text{CDCl}_3$ )  $\delta$  2.63 (s, 3H), 2.61 (s, 6H), 2.47 (s, 6H). ppm.

The synthetic method reference reported works. Yields 65 %. **B-3**:  $^1\text{H}$  NMR (400 MHz,  $\text{CDCl}_3$ )  $\delta$  7.54–7.51 (m, 5H) 2.66 (s, 6H), 1.40 (s, 6H)

### c) General Procedure for the Preparation of *N*-phenyl-tetrahydroisoquinolines<sup>[1,2]</sup>

Potassium phosphate (4.25 g, 20.0 mmol) and Copper (I) iodide (200 mg, 1.0 mmol) were put into a Schlenk-tube. The Schlenk-tube was evacuated and back filled with nitrogen. 2-Propanol (10.0 mL), ethylene glycol (1.11 mL, 20.0mmol), 1,2,3,4-tetrahydroisoquinoline (2.0 mL, 15.0 mmol) and iodobenzene (1.12 mL, 10.0 mmol) were added successively at room temperature. The reaction mixture was heated to 90 °C and kept for 24 h and then allowed to cool to room temperature. Diethyl ether (25 mL) and water (25 mL) were then added to the reaction mixture. The organic layer was extracted with diethyl ether (2 × 25 mL). The combined organic phases were washed with brine and dried over sodium sulfate. The solvent was removed by rotary evaporation and purified by column chromatography on silica gel using petroleum ether/ethyl acetate (20 : 1) as eluent.

### d) General Procedure CDC Reaction

2-phenyl-1,2,3,4-tetrahydroisoquinoline (20.9 mg, 0.1 mmol), 2 mL  $\text{CH}_3\text{NO}_2$  and **B-1** (0.001 mmol) were mixed in the reaction tube with magnetic stirring bar. The tube was irradiated by white LEDs for 3 h. After reaction the solvent was removed by rotary evaporation and purified by column chromatography on silica gel using petroleum ether/ethyl acetate (10:1) as eluent.

### e) Thermodynamic Calculation

Determined oxidation potential of  $E_{\text{ox}}$  (**1a**) = 0.82 V,  $E_{\text{red}}$  (**B-1**) = -1.20 V and  $E_{00}$  = 2.46 eV (read from the cross-point of the absorption and luminescence spectra at 504 nm), the negative free energy change ( $\Delta G$  = -0.80 eV) calculated by using the Rehm–Weller Equation (1).

$$\Delta G = E_{\text{ox}} - E_{\text{red}} - E_{00} \quad (1)$$

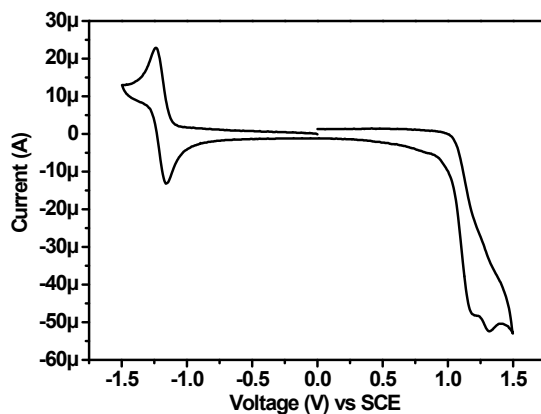

Figure S1 1 mM **B-1** and 0.1 M TBAPF<sub>6</sub> in CH<sub>3</sub>CN with scan rate 100 mV/s

Table S1 The effect of solvents in C-P CDC reaction <sup>a</sup>

|                    | Bodipy-1 | conversion | time (h) | yield <sup>b</sup> (%) |
|--------------------|----------|------------|----------|------------------------|
| CH <sub>3</sub> CN | 1 mol %  | 100%       | 5        | 0%                     |
| DCM                | 1 mol %  | 100%       | 5        | 50%                    |
| DMF                | 1 mol %  | 100%       | 5        | 0%                     |
| THF                | 1 mol %  | 100%       | 5        | 80%                    |
| MePh               | 1 mol %  | 100%       | 5        | 88%                    |
| MeOH               | 1 mol %  | 100%       | 5        | 96%                    |

<sup>a</sup> Reaction conditions: 0.001 mmol **B-1** (1 mol %), **1a** 0.1 mmol and 0.1 mmol **6** in the reaction tube irradiated by white LEDs for 5 h. <sup>b</sup> Yields detected by NMR spectroscopy using an internal standard, diphenylacetonitrile.

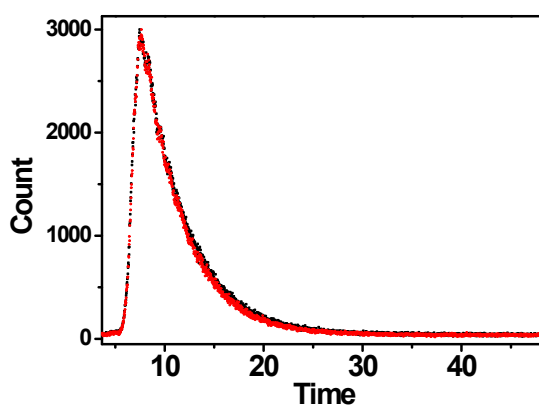

Figure S2. Fluorescent lifetime of **B-1**  $1 \times 10^{-5}$  M in MeOH solution in air present (red) and absent (black) of *N*-phenyltetrahydroisoquinoline **1a**.

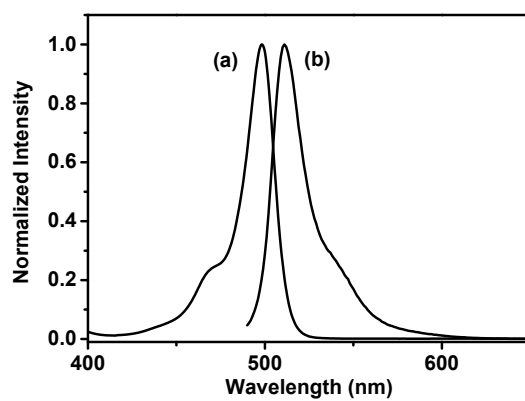

Figure S3. Absorption and fluorescence spectrum of **B-1** ( $1 \times 10^{-5}$  M) in MeOH.

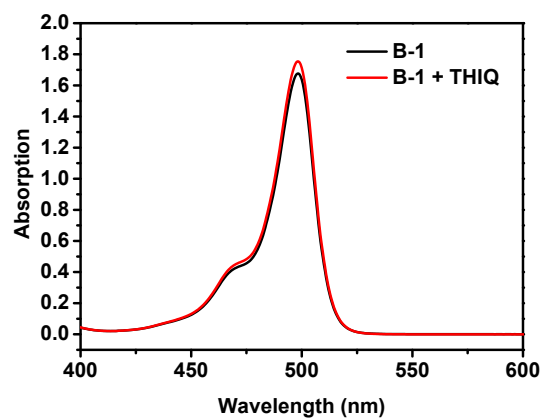

Figure S4 Absorption of 0.001 mmol **B-1** and 0.001mmol **B-1** (black) with 0.1 mmol THIQ in 3 mL MeOH. This can exclude formation of electron-donor-acceptor complexes (EDA ) in reaction system.

## 2. Characterization of All Compounds

### 1-Nitromethyl-2-phenyl-1,2,3,4-tetrahydroisoquinoline

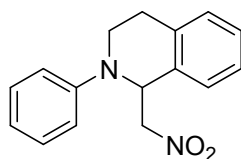

**3a**

Purified by column chromatography on silica gel (eluting with hexane/ethyl acetate = 5:1,  $R_f$  = 0.5). Melting point is 90 - 91 °C.  $^1\text{H}$  NMR (400 MHz,  $\text{CDCl}_3$ )  $\delta$  = 7.30 – 7.10 (m, 6H), 6.97 (d,  $J$  = 8.0 Hz, 2H), 6.84 (t,  $J$  = 7.3 Hz, 1H), 5.54 (t,  $J$  = 7.2 Hz, 1H), 4.86 (dd,  $J$  = 11.8, 7.8 Hz, 1H), 4.55 (dd,  $J$  = 11.8, 6.7 Hz, 1H), 3.71 – 3.56 (m, 2H), 3.08 (m, 1H), 2.78 ppm (dt,  $J$  = 16.3, 5.0 Hz, 1H);  $^{13}\text{C}$  NMR (100 MHz,  $\text{CDCl}_3$ )  $\delta$  = 148.4, 135.3, 132.9, 129.5, 129.2, 128.1, 127.0, 126.7, 119.4, 115.1, 78.8, 58.2, 42.1, 26.5 ppm. EI-MS  $m/z$  (%): 268 (43) [ $\text{M}^+$ ], 208 (100), 77 (5).

### 1-(1-Nitroethyl)-2-phenyl-1,2,3,4-tetrahydroisoquinoline

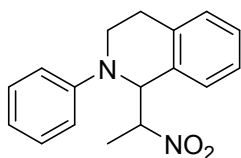

**3b**

Purified by column chromatography on silica gel (eluting with hexane/ethyl acetate = 5:1,  $R_f$  = 0.6). Orange oil.  $^1\text{H}$  NMR (400 MHz,  $\text{CDCl}_3$ )  $\delta$  = 7.32 – 7.07 (m, 6H), 7.01 - 6.98 (m, 2H), 6.84 - 6.77 (m, 1H), 5.24 (t,  $J$  = 8.8 Hz, 1H), [5.08 – 5.01 (m), 4.90 – 4.86 (m) 1H], [3.85 – 3.81 (m), 3.60 – 3.55 (m) 2H], [3.12 – 2.98 (m), 2.97 – 2.80 (m), 2H], [1.69 (d,  $J$  = 6.8 Hz), 1.53 (d,  $J$  = 6.7 Hz), 3H] ppm;  $^{13}\text{C}$  NMR (100 MHz,  $\text{CDCl}_3$ )  $\delta$  = 149.2, 148.9, 135.6, 134.8, 133.8, 129.4, 129.3, 129.1, 128.7, 128.3, 128.2, 127.3, 126.6, 126.1, (119.3, 118.8), (115.4, 114.5), (88.9, 85.4), (62.7, 61.1), (43.5, 42.7), (26.8, 26.4), (17.4, 16.4) ppm; EI-MS  $m/z$  (%): 282 (17) [ $\text{M}^+$ ], 208 (100), 104 (46), 77 (55).

### 1-(1-Nitropropyl)-2-phenyl-1,2,3,4-tetrahydroisoquinoline

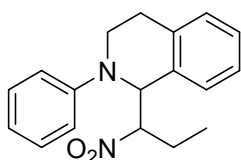

**3c**

Purified by column chromatography on silica gel (eluting with hexane/ethyl acetate = 5:1,  $R_f$  = 0.5). Orange oil.  $^1\text{H}$  NMR (400 MHz,  $\text{CDCl}_3$ )  $\delta$  = 7.36 – 7.09 (m, 6H), 7.04 – 6.89 (m, 2H), 6.86 – 6.72 (m, 1H), [5.23 (d,  $J$  = 9.3 Hz), 5.12 (d,  $J$  = 9.5 Hz) 1H], [4.89 – 4.83 (m), 4.70 – 4.64 (m) 1H], [3.88 – 3.81 (m), 3.69 – 3.49 (m) 2H], [3.11 – 3.03 (m), 2.94 – 2.83 (m), 2H], [2.28 – 2.03 (m), 1.85 – 1.79 (m) 2H], 0.96 – 0.91 ppm (m, 3H);  $^{13}\text{C}$  NMR (100 MHz,  $\text{CDCl}_3$ )  $\delta$  = 149.1, 149.0, 135.5, 134.7, 132.6, 129.5, 129.4, 129.4, 129.3, 129.2, 128.7, 128.6, 128.2, 127.2, 126.6, 125.9, (119.4, 118.6), (115.9, 114.1), (96.1, 93.0), (62.2, 60.7), (43.5, 42.3), (26.8, 25.7), (25.0, 24.6), 10.7 ppm; EI-MS  $m/z$  (%): 296 (36) [ $\text{M}^+$ ], 209 (100), 115 (78), 104 (82), 77 (81).

### 2-(4-Fluorophenyl)-1-nitromethyl-1,2,3,4-tetrahydroisoquinoline

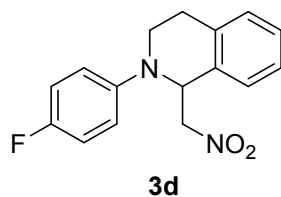

Purified by column chromatography on silica gel (eluting with hexane/ethyl acetate = 6:1,  $R_f$  = 0.5). Yellow oil.  $^1\text{H}$  NMR (400 MHz,  $\text{CDCl}_3$ )  $\delta$  = 7.34 – 7.04 (m, 4H), 7.00 – 6.83 (m, 4H), 5.42 (dd,  $J$  = 8.8, 6.0 Hz, 1H), 4.82 (dd,  $J$  = 12.0, 8.6 Hz, 1H), 4.56 (dd,  $J$  = 12.0, 5.8 Hz, 1H), 3.67 – 3.53 (m, 2H), 3.02 (m, 1H), 2.71 ppm (dt,  $J$  = 16.5, 4.2 Hz, 1H).  $^{13}\text{C}$  NMR (100 MHz,  $\text{CDCl}_3$ )  $\delta$  = 157.2 (d,  $J_{\text{C-F}}$  = 237.8 Hz), 145.3, 135.2, 132.6, 129.4, 128.1, 127.0, 126.8, 126.7, 117.9 (d,  $J_{\text{C-F}}$  = 7.4 Hz), 115.8 (d,  $J_{\text{C-F}}$  = 22.2 Hz), 78.9, 58.7, 42.8, 28.6, 25.81 ppm; HRMS (EI): calcd for  $\text{C}_{16}\text{H}_{15}\text{FN}_2\text{O}_2$ : 286.1118; found: 286.1117.

**2-(4-Chlorophenyl)-1-nitromethyl-1,2,3,4-tetrahydroisoquinoline**

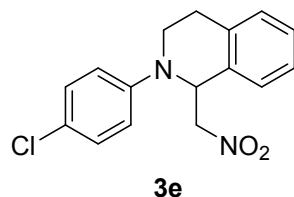

Purified by column chromatography on silica gel (eluting with hexane/ethyl acetate = 6:1,  $R_f$  = 0.3). Yellow oil.  $^1\text{H}$  NMR (400 MHz,  $\text{CDCl}_3$ )  $\delta$  = 7.43 – 7.07 (m, 6H), 6.88 (d,  $J$  = 9.0 Hz, 2H), 5.48 (dd,  $J$  = 8.1, 6.4 Hz, 1H), 4.83 (dd,  $J$  = 11.9, 8.2 Hz, 1H), 4.55 (dd,  $J$  = 12.0, 6.3 Hz, 1H), 3.68 – 3.51 (m, 2H), 3.05 (ddd,  $J$  = 15.4, 8.5, 6.2 Hz, 1H), 2.77 ppm (dt,  $J$  = 16.4, 4.8 Hz, 1H);  $^{13}\text{C}$  NMR (100 MHz,  $\text{CDCl}_3$ )  $\delta$  = 147.1, 135.0, 132.5, 129.3, 128.2, 126.9, 126.8, 124.4, 116.5, 78.6, 58.2, 42.2, 26.1 ppm; EIMS:  $m/z$ (%): 302 (94) [ $\text{M}^+$ ], 244 (100), 149(64), 115 (72), 111 (50), 77 (14).

**2-(4-Bromophenyl)-1-nitromethyl-1,2,3,4-tetrahydroisoquinoline**

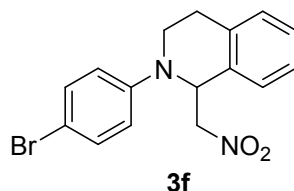

Purified by column chromatography on silica gel (eluting with hexane/ethyl acetate = 6:1,  $R_f$  = 0.5). Orange oil.  $^1\text{H}$  NMR (400 MHz,  $\text{CDCl}_3$ )  $\delta$  = 7.34 (d,  $J$  = 9.1 Hz, 2H), 7.29 – 7.06 (m, 4H), 6.88 – 6.81 (m, 2H), 5.47 (t,  $J$  = 8.0 Hz, 1H), 4.83 (dd,  $J$  = 12.1, 8.1, 1H), 4.56 (dd,  $J$  = 11.9, 6.4, 1H), 3.67 – 3.54 (m, 2H), 3.12 – 3.01 (m, 1H), 2.78 (dt,  $J$  = 16.1, 4.8, 1H) ppm;  $^{13}\text{C}$  NMR (100 MHz,  $\text{CDCl}_3$ )  $\delta$  = 147.5, 135.0, 132.4, 132.2, 129.2, 128.2, 126.9, 126.7, 116.7, 111.5, 78.6, 58.0, 42.0, 26.1 ppm; EIMS:  $m/z$ (%): 348 (62), 346 (65) [ $\text{M}^+$ ], 288(100), 118 (99), 90 (25), 77 (12).

**1-Nitromethyl-2-p-tolyl-1,2,3,4-tetrahydroisoquinoline**

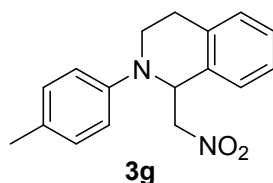

Purified by column chromatography on silica gel (eluting with hexane/ethyl acetate = 6:1,  $R_f$  = 0.5). White oil.;  $^1\text{H}$  NMR (400 MHz,  $\text{CDCl}_3$ )  $\delta$  = 7.27 – 7.09 (m, 4H), 7.06 (d,  $J$  = 8.3 Hz, 2H), 6.86 (d,  $J$  = 8.3 Hz, 2H), 5.48 (dd,  $J$  = 8.0, 6.4 Hz, 1H), 4.82 (dd,  $J$  = 11.8, 8.1 Hz, 1H), 4.53 (dd,  $J$  = 11.8, 6.3 Hz, 1H), 3.66 – 3.48 (m, 2H),

3.08 – 3.0 (m, 1H), 2.72 (dt,  $J = 16.4, 4.6$  Hz, 1H), 2.25 ppm (s, 3H);  $^{13}\text{C}$  NMR (100 MHz,  $\text{CDCl}_3$ )  $\delta = 146.4, 135.3, 133.0, 130.0, 129.3, 129.1, 128.0, 127.0, 126.6, 115.9, 78.8, 58.4, 42.3, 26.2, 20.4$  ppm; EI-MS  $m/z$  (%): 282 (60) [ $\text{M}^+$ ], 222 (100), 118 (64), 91 (66), 77(12).

**2-(4-Methoxyphenyl)-1-nitromethyl-1,2,3,4-tetrahydroisoquinoline**

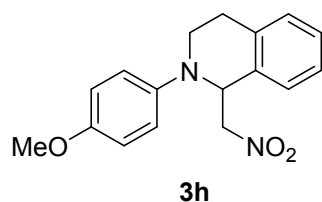

Purified by column chromatography on silica gel (eluting with hexane/ethyl acetate = 5:1,  $R_f = 0.4$ ). Orange oil.  $^1\text{H}$  NMR (400 MHz,  $\text{CDCl}_3$ )  $\delta = 7.28 - 7.11$  (m, 4H), 6.91 (d,  $J = 9.0$  Hz, 2H), 6.81 (d,  $J = 9.2$  Hz, 2H), 5.38 (dd,  $J = 8.7, 5.9$  Hz, 1H), 4.82 (dd,  $J = 11.9, 8.6$  Hz, 1H), 4.55 (dd,  $J = 11.9, 5.8$  Hz, 1H), 3.74 (s, 3H), 3.62 – 3.47 (m, 2H), 3.05 – 2.96 (m, 1H), 2.68 ppm (dt,  $J = 16.5, 4.1$  Hz, 1H);  $^{13}\text{C}$  NMR (100 MHz,  $\text{CDCl}_3$ )  $\delta = 154.0, 143.0, 135.4, 132.9, 129.4, 127.9, 126.9, 126.6, 118.8, 114.7, 78.9, 58.9, 55.6, 43.1, 25.8$  ppm. EI-MS  $m/z$  (%): 298 (73) [ $\text{M}^+$ ], 239 (100), 223 (55), 115 (50), 91(12), 77 (18) .

**6,7-Dimethoxy-2-(4-methoxyphenyl)-1-nitromethyl-1,2,3,4-tetrahydroisoquinoline**

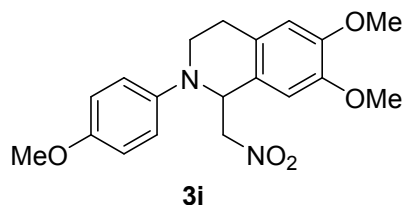

Purified by column chromatography on silica gel (eluting with hexane/ethyl acetate = 4:1,  $R_f = 0.4$ ). Orange oil.  $^1\text{H}$  NMR (400 MHz, Acetone- $d_6$ )  $\delta = 6.99$  (s, 1H), 6.94 (d,  $J = 9.1$  Hz, 2H), 6.79 (d,  $J = 9.1$  Hz, 2H), 6.72 (s, 1H), 5.36 (dd,  $J = 8.9, 5.9$  Hz, 1H), 5.00 – 4.90 (m, 2H), 3.80 (s, 3H), 3.77 (s, 3H), 3.70 (s, 3H), 3.67 – 3.58 (m, 2H), 2.91 – 2.85 (m, 1H), 2.52 ppm (dt,  $J = 16.5, 3.2$  Hz, 1H);  $^{13}\text{C}$  NMR (100 MHz, Acetone)  $\delta = 154.3, 149.4, 148.5, 143.9, 128.1, 124.9, 119.3, 115.7, 114.8, 112.9, 111.2, 78.9, 55.6, 55.5, 55.2, 55.0, 42.8, 24.4$  ppm. EI-MS:  $m/z$  (%): 358 (78) [ $\text{M}^+$ ], 298 (92), 296 (100), 282 (80), 254 (39), 149 (42), 77 (8).

**Dimethy 2-(2-phenyl-1,2,3,4-tetrahydroisoquinolin-1-yl)malonate**

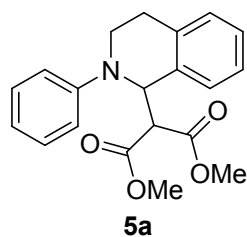

Purified by column chromatography on silica gel (eluting with hexane/ethyl acetate = 5:1,  $R_f = 0.4$ ). Orange oil.  $^1\text{H}$  NMR (400 MHz,  $\text{CDCl}_3$ )  $\delta = 7.32 - 7.06$  (m, 7H), 6.99 (d,  $J = 8.1$ , 2H), 6.77 (t,  $J = 7.3$ , 1H), 5.71 (d,  $J = 9.4$ , 1H), 3.96 (d,  $J = 9.4$ , 1H), 3.78 – 3.58 (m, 5H), 3.55 (s, 3H), 3.08 (ddd,  $J = 15.6, 8.9, 6.3$ , 1H), 2.87 (dt,  $J = 16.5, 5.1$ , 1H) ppm ;  $^{13}\text{C}$  NMR (100 MHz,  $\text{CDCl}_3$ )  $\delta = 168.6, 167.7, 149.1, 136.0, 135.1, 129.4, 129.3, 128.0, 127.4, 126.4, 119.0, 115.5, 59.4, 58.5, 52.9, 42.5, 26.4$  ppm; EIMS:  $m/z$  (%): 339 (47) [ $\text{M}^+$ ], 209 (100), 193 (56), 115(66), 77(74).

**Diethyl 2-(2-phenyl-1,2,3,4-tetrahydroisoquinolin-1-yl)malonate**

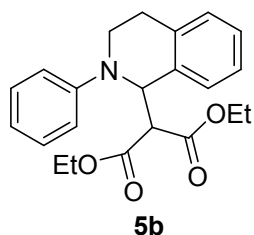

Purified by column chromatography on silica gel (eluting with hexane/ethyl acetate = 5:1,  $R_f$  = 0.4). Orange oil.  $^1\text{H}$  NMR (400 MHz,  $\text{CDCl}_3$ )  $\delta$  = 7.26 – 7.07 (m, 6H), 6.98 (d,  $J$  = 8.3 Hz, 2H), 6.75 (t,  $J$  = 7.2 Hz, 1H), 5.72 (d,  $J$  = 9.2 Hz, 1H), 4.28 – 3.93 (m, 4H), 3.90 (d,  $J$  = 9.2 Hz, 1H), 3.77 – 3.57 (m, 2H), 3.07 (ddd,  $J$  = 15.5, 8.9, 6.2 Hz, 1H), 2.88 (dt,  $J$  = 16.4, 5.1 Hz, 1H), 1.17 (t,  $J$  = 7.1 Hz, 3H), 1.09 ppm (t,  $J$  = 7.1 Hz, 3H).  $^{13}\text{C}$  NMR (100 MHz,  $\text{CDCl}_3$ )  $\delta$  = 167.9, 167.1, 148.8, 135.9, 134.8, 129.0, 128.8, 127.5, 127.2, 126.0, 118.4, 115.1, 61.5, 61.5, 59.5, 57.8, 42.3, 26.1, 13.9, 13.8 ppm; HRMS (ESI): calcd. for  $\text{C}_{22}\text{H}_{26}\text{NO}_4$   $[\text{M} + \text{H}]^+$  368.1862; found 368.1858.

**Diethyl (2-phenyl-1,2,3,4-tetrahydroisoquinolin-1-yl)phosphonate**

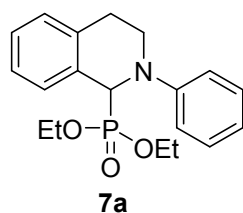

Purified by column chromatography on silica gel (eluting with hexane/ethyl acetate = 5:1,  $R_f$  = 0.4). Orange oil.  $^1\text{H}$  NMR (400 MHz,  $\text{CDCl}_3$ )  $\delta$  = 7.40 – 7.35 (m, 1H), 7.27 – 7.15 (m, 5H), 6.98 (d,  $J$  = 8.2 Hz, 2H), 6.79 (t,  $J$  = 7.3 Hz, 1H), 5.19 (d,  $J$  = 20.0 Hz, 1H), 4.12 – 3.86 (m, 5H), 3.65 – 3.59 (m, 1H), 3.12 – 2.94 (m, 2H), 1.25 (t,  $J$  = 7.1 Hz, 3H), 1.14 ppm (t,  $J$  = 7.1 Hz, 3H);  $^{13}\text{C}$  NMR (100 MHz,  $\text{CDCl}_3$ )  $\delta$  = 149.4 (d,  $J$  = 6 Hz), 136.6 (d,  $J$  = 5.3 Hz), 130.8, 129.0 (d,  $J$  = 2.5 Hz) (d,  $J$  = 4.3 Hz), 127.7 (d,  $J$  = 3.7 Hz), 125.9 (d,  $J$  = 2.6 Hz), 118.6, 114.9, 63.5 (d,  $J$  = 7.1 Hz), 62.4 (d,  $J$  = 7.6 Hz), 59.7 (d,  $J$  = 158.3 Hz), 43.6, 26.8, 16.6 (d,  $J$  = 5.5 Hz), 16.4 (d,  $J$  = 6.1 Hz) ppm. HRMS (ESI): calcd. for  $\text{C}_{19}\text{H}_{24}\text{NNaO}_3\text{P}$   $[\text{M} + \text{Na}]^+$  368.1391; found 368.1387.

**Diisopropyl (2-phenyl-1,2,3,4-tetrahydroisoquinolin-1-yl)phosphonate**

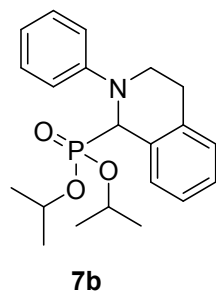

Purified by column chromatography on silica gel (eluting with hexane/ethyl acetate = 5:1,  $R_f$  = 0.4). Orange oil.  $^1\text{H}$  NMR (400 MHz,  $\text{CDCl}_3$ )  $\delta$  = 7.40 (d,  $J$  = 6.7 Hz, 1H), 7.23 – 7.10 (m, 5H), 6.95 (d,  $J$  = 8.3 Hz, 2H), 6.76 (t,  $J$  = 7.2 Hz, 1H), 5.14 (d,  $J$  = 21.2 Hz, 1H), 4.62 – 4.55 (m, 2H), 4.13 – 3.98 (m, 1H), 3.67 – 3.60 (m, 1H), 3.09 – 2.90 (m, 2H), 1.38 – 1.24 (m, 6H), 1.16 (d,  $J$  = 6.2 Hz, 3H), 0.94 ppm (d,  $J$  = 6.2 Hz, 3H);  $^{13}\text{C}$  NMR (100 MHz,  $\text{CDCl}_3$ )  $\delta$  = 149.6 (d,  $J$  = 6.6 Hz), 136.5 (d,  $J$  = 5.5 Hz), 130.0 (d,  $J$  = 1.9 Hz), 128.8 (d,  $J$  = 2.5 Hz), 128.5 (d,  $J$  = 4.6 Hz), 127.3 (d,  $J$  = 3.4 Hz), 125.7 (d,  $J$  = 2.8 Hz), 118.4, 115.1, 72.3 (d,  $J$  = 7.8 Hz), 70.0 (d,  $J$  = 8.2 Hz), 59.0 (d,  $J$  = 200 Hz), 43.6, 31.0, 26.7, 24.7 (d,  $J$  = 2.8 Hz), 24.2 (d,  $J$  = 3.2 Hz), 23.8 (d,  $J$  = 5.6 Hz), 23.4 ppm (d,  $J$  = 5.6 Hz); HRMS (ESI): calcd. for  $\text{C}_{19}\text{H}_{24}\text{NNaO}_3\text{P}$   $[\text{M} + \text{H}]^+$  374.1885; found 374.1882.

**Dibenzyl (2-phenyl-1,2,3,4-tetrahydroisoquinolin-1-yl)phosphonate**



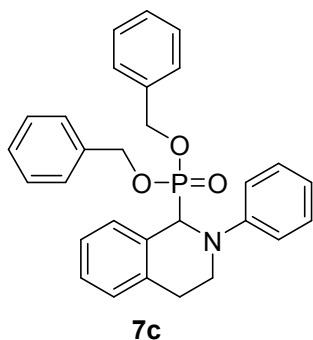

Purified by column chromatography on silica gel (eluting with hexane/ethyl acetate = 5:1,  $R_f$  = 0.4). Orange oil.  $^1\text{H}$  NMR (400 MHz, Acetone)  $\delta$  = 7.44 (d,  $J$  = 7.5, 1H), 7.35 – 7.13 (m, 15H), 7.06 (d,  $J$  = 8.3, 2H), 6.75 (t,  $J$  = 7.2, 1H), 5.44 (d,  $J$  = 20.4, 1H), 5.08 – 5.00 (m, 1H), 4.99 – 4.86 (m, 2H), 4.82 (dd,  $J$  = 11.9, 7.8, 1H), 4.08 (ddd,  $J$  = 13.1, 8.7, 4.8, 1H), 3.72 – 3.63 (m, 1H), 3.09 (ddd,  $J$  = 15.9, 7.9, 5.1, 1H), 3.02 – 2.92 ppm (m, 1H);  $^{13}\text{C}$  NMR (100 MHz, Acetone)  $\delta$  = 150.2 (d,  $J$  = 10 Hz), 137.9 (dd,  $J$  = 10.0, 5.8 Hz), 137.6 (d,  $J$  = 5.5 Hz), 130.5 (d,  $J$  = 10 Hz), 129.5 (d,  $J$  = 2.6 Hz), 129.4, 129.3, 129.3, 129.2, 129.0, 128.9, 128.8, 128.7, 128.3 (d,  $J$  = 3.5 Hz), 126.7 (d,  $J$  = 2.8 Hz), 119.2, 115.8, 68.9 (d,  $J$  = 7.1 Hz), 68.1 (d,  $J$  = 7.6 Hz), 59.3 (d,  $J$  = 150 Hz), 44.3, 27.4 ppm; HRMS (ESI): calcd. for  $\text{C}_{29}\text{H}_{29}\text{NO}_3\text{P}$   $[\text{M} + \text{H}]^+$  470.1885; found 470.1882.

**Diphenyl (2-phenyl-1,2,3,4-tetrahydroisoquinolin-1-yl)phosphonate**

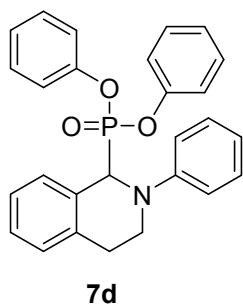

Purified by column chromatography on silica gel (eluting with hexane/ethyl acetate = 5:1,  $R_f$  = 0.4). Orange oil.  $^1\text{H}$  NMR (400 MHz,  $\text{CDCl}_3$ )  $\delta$  = 7.52 (d,  $J$  = 7.4 Hz, 1H), 7.30 – 6.99 (m, 15H), 6.85 (dd,  $J$  = 15.2, 7.6 Hz, 3H), 5.59 (d,  $J$  = 19.9 Hz, 1H), 4.06 (ddd,  $J$  = 13.1, 8.5, 5.1 Hz, 1H), 3.73 – 3.60 (m, 1H), 3.04 ppm (dt,  $J$  = 11.3, 6.6 Hz, 2H).  $^{13}\text{C}$  NMR (100 MHz,  $\text{CDCl}_3$ )  $\delta$  = 150.8 (d,  $J$  = 10.4 Hz), 150.4 (d,  $J$  = 11.3 Hz), 149.2 (d,  $J$  = 6.8 Hz), 136.7 (d,  $J$  = 5.9 Hz), 129.6, 129.4, 129.2, 129.0 (d,  $J$  = 2.8 Hz), 128.4 (d,  $J$  = 5.0 Hz), 127.9 (d,  $J$  = 3.8 Hz), 126.2 (d,  $J$  = 3.1 Hz), 125.0 (d,  $J$  = 1.2 Hz), 124.8, 120.6 (d,  $J$  = 4.1 Hz), 120.3 (d,  $J$  = 4.2 Hz), 119.1, 115.5, 59.9, 58.4, 44.0, 26.6 ppm.; HRMS (ESI): calcd. for  $\text{C}_{27}\text{H}_{28}\text{N}_2\text{O}_3\text{P}$   $[\text{M} + \text{Na}]^+$  459.1838; found 459.1833.

**Diethyl(2-(4-fluorophenyl)-1,2,3,4-tetrahydroisoquinolin-1-yl)phosphonate**

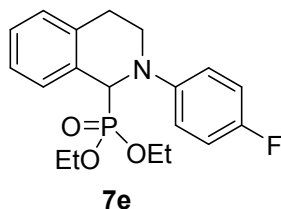

Purified by column chromatography on silica gel (eluting with hexane/ethyl acetate = 5:1,  $R_f$  = 0.3). Orange oil.  $^1\text{H}$  NMR (400 MHz,  $\text{CDCl}_3$ )  $\delta$  = 7.37 (d,  $J$  = 6.7 Hz, 1H), 7.24 – 7.11 (m, 3H), 6.98 – 6.88 (m, 4H), 5.06 (d,  $J$  = 20.3 Hz, 1H), 4.15 – 3.85 (m, 5H), 3.59 – 3.48 (m, 1H), 3.10 – 2.88 (m, 2H), 1.24 (t,  $J$  = 7.1 Hz, 3H), 1.15

ppm (t,  $J = 7.1$  Hz, 3H);  $^{13}\text{C}$  NMR (100 MHz,  $\text{CDCl}_3$ )  $\delta = 156.4$  (d,  $J = 238.0$  Hz),  $146.2$  (dd,  $J = 6.6, 2.0$  Hz),  $136.3$  (d,  $J = 5.6$  Hz),  $130.4$ ,  $128.8$  (d,  $J = 2.6$  Hz),  $128.2$  (d,  $J = 4.6$  Hz),  $127.5$  (d,  $J = 3.5$  Hz),  $125.9$  (d,  $J = 2.9$  Hz),  $116.6$  (d,  $J = 7.4$  Hz),  $115.5$  (d,  $J = 16.0$  Hz),  $63.3$  (d,  $J = 7.3$  Hz),  $62.4$  (d,  $J = 7.7$  Hz),  $59.35$  (d,  $J = 159.0$  Hz),  $44.3$ ,  $26.6$ ,  $16.4$  ppm (dd,  $J = 8.4, 5.7$  Hz); HRMS (ESI): calcd. for  $\text{C}_{19}\text{H}_{23}\text{FNNaO}_3\text{P}$   $[\text{M} + \text{Na}]^+$  386.1297; found 386.1293.

**Diethyl(2-(4-chlorophenyl)-1,2,3,4-tetrahydroisoquinolin-1-yl)phosphonate**

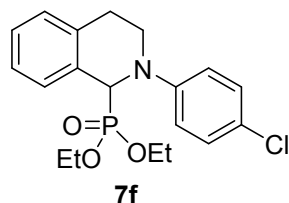

Purified by column chromatography on silica gel (eluting with hexane/ethyl acetate = 5:1,  $R_f = 0.3$ ). Orange oil.  $^1\text{H}$  NMR (400 MHz,  $\text{CDCl}_3$ )  $\delta = 7.35$  (d,  $J = 7.0$  Hz, 1H),  $7.25 - 7.12$  (m, 5H),  $6.89$  (d,  $J = 9.0$  Hz, 2H),  $5.10$  (d,  $J = 19.3$  Hz, 1H),  $4.17 - 3.80$  (m, 6H),  $3.55$  (m, 1H),  $3.10$  (m, 1H),  $2.95$  (m, 1H),  $1.23$  (t,  $J = 7.1$  Hz, 4H),  $1.14$  ppm (t,  $J = 7.0$  Hz, 3H);  $^{13}\text{C}$  NMR (100 MHz,  $\text{CDCl}_3$ )  $\delta = 147.9$  (d,  $J = 5.1$  Hz),  $136.3$  (d,  $J = 5.4$  Hz),  $130.4$ ,  $128.9$ ,  $128.6$  (d,  $J = 2.7$  Hz),  $128.1$  (d,  $J = 4.8$  Hz),  $127.6$  (d,  $J = 3.5$  Hz),  $126.0$  (d,  $J = 2.8$  Hz),  $123.1$ ,  $118.2$  (d,  $J = 2.1$  Hz),  $115.7$ ,  $107.5$ ,  $63.2$  (d,  $J = 7.3$  Hz),  $62.4$  (d,  $J = 7.7$  Hz),  $58.8$  (d,  $J = 159.6$  Hz),  $43.7$ ,  $26.9$ ,  $16.4$  (d,  $J = 5.5$  Hz),  $16.3$  ppm (d,  $J = 5.5$  Hz); HRMS (ESI): calcd. for  $\text{C}_{19}\text{H}_{23}\text{ClNNaO}_3\text{P}$   $[\text{M} + \text{Na}]^+$  402.1002; found 402.0997.

**Diethyl(2-(4-bromophenyl)-1,2,3,4-tetrahydroisoquinolin-1-yl)phosphonate**

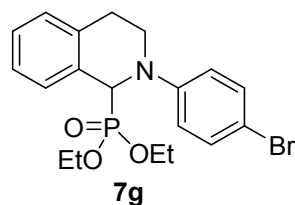

Purified by column chromatography on silica gel (eluting with hexane/ethyl acetate = 5:1,  $R_f = 0.3$ ). Orange oil.  $^1\text{H}$  NMR (400 MHz,  $\text{CDCl}_3$ )  $\delta = 7.38 - 7.29$  (m, 4H),  $7.25 - 7.13$  (m, 3H),  $6.85$  (t,  $J = 6.2$  Hz, 2H),  $5.10$  (d,  $J = 19.2$  Hz, 1H),  $3.90$  (m, 6H),  $3.49$  (m, 1H),  $3.15$  (m, 2H),  $1.24$  (t,  $J = 7.1$  Hz, 3H),  $1.14$  ppm (t,  $J = 7.1$  Hz, 3H);  $^{13}\text{C}$  NMR (100 MHz,  $\text{CDCl}_3$ )  $\delta = 148.3$  (d,  $J = 4.9$  Hz),  $136.3$  (d,  $J = 5.4$  Hz),  $131.9$ ,  $131.8$ ,  $130.4$ ,  $128.6$  (d,  $J = 2.7$  Hz),  $128.1$  (d,  $J = 4.8$  Hz),  $127.6$  (d,  $J = 3.5$  Hz),  $126.0$  (d,  $J = 2.7$  Hz),  $116.1$ ,  $110.3$ ,  $63.2$  (d,  $J = 7.3$  Hz),  $62.4$  (d,  $J = 7.7$  Hz),  $59.5$ ,  $57.9$ ,  $43.6$ ,  $26.9$ ,  $16.48$  (d,  $J = 5.4$  Hz),  $16.38$  ppm (d,  $J = 5.8$  Hz); HRMS (ESI): calcd. for  $\text{C}_{19}\text{H}_{23}\text{BrNNaO}_3\text{P}$   $[\text{M} + \text{Na}]^+$  446.0497; found 446.0492.

**Diethyl (2-(p-tolyl)-1,2,3,4-tetrahydroisoquinolin-1-yl)phosphonate**

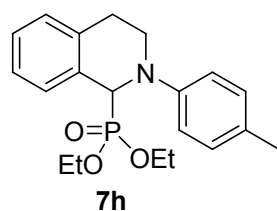

Purified by column chromatography on silica gel (eluting with hexane/ethyl acetate = 5:1,  $R_f = 0.3$ ). Orange oil.  $^1\text{H}$  NMR (400 MHz,  $\text{CDCl}_3$ )  $\delta = 7.37$  (d,  $J = 6.5$  Hz, 1H),  $7.15$  (ddd,  $J = 16.8, 6.9, 3.9$  Hz, 3H),  $7.05$  (d,  $J = 8.4$

Hz, 2H), 6.88 (d,  $J$  = 8.6 Hz, 2H), 5.11 (d,  $J$  = 20.8 Hz, 1H), 4.21 – 3.85 (m, 5H), 3.67 – 3.55 (m, 1H), 2.98 (dd,  $J$  = 4.9, 2.9 Hz, 2H), 2.25 (s, 3H), 1.25 (t,  $J$  = 7.1 Hz, 3H), 1.15 ppm (t,  $J$  = 7.1 Hz, 3H);  $^{13}\text{C}$  NMR (100 MHz,  $\text{CDCl}_3$ )  $\delta$  147.46 (d,  $J$  = 7.0 Hz), 136.49 (d,  $J$  = 5.7 Hz), 130.66, 129.67, 128.83 (d,  $J$  = 2.5 Hz), 128.17 (d,  $J$  = 4.5 Hz), 127.98, 127.33 (d,  $J$  = 3.5 Hz), 125.81 (d,  $J$  = 2.9 Hz), 115.35, 63.34 (d,  $J$  = 7.2 Hz), 62.27 (d,  $J$  = 7.7 Hz), 59.87, 58.28, 43.84, 26.45, 20.31, 16.51 (d,  $J$  = 5.5 Hz), 16.40 ppm (d,  $J$  = 5.8 Hz).; HRMS (ESI): calcd. for  $\text{C}_{20}\text{H}_{26}\text{NNaO}_3\text{P}$   $[\text{M} + \text{Na}]^+$  382.1548; found 382.1543.

**Diethyl(2-(4-methoxyphenyl)-1,2,3,4-tetrahydroisoquinolin-1-yl)phosphonate**

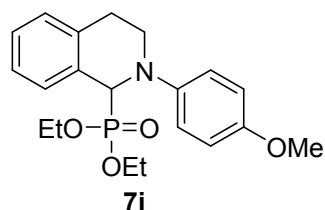

Purified by column chromatography on silica gel (eluting with hexane/ethyl acetate = 4:1,  $R_f$  = 0.3). Orange oil.  $^1\text{H}$  NMR (400 MHz,  $\text{CDCl}_3$ )  $\delta$  = 7.41 – 7.35 (m, 1H), 7.21 – 7.10 (m, 3H), 6.92 (d,  $J$  = 9.1 Hz, 2H), 6.81 (d,  $J$  = 9.1 Hz, 2H), 5.02 (d,  $J$  = 21.5 Hz, 1H), 4.18 – 3.89 (m, 5H), 3.74 (s, 3H), 3.54 (m, 1H), 2.92 (m, 2H), 1.25 (t,  $J$  = 7.1 Hz, 3H), 1.16 ppm (t,  $J$  = 7.1 Hz, 3H);  $^{13}\text{C}$  NMR (100 MHz,  $\text{CDCl}_3$ )  $\delta$  = 153.1, 144.2 (d,  $J$  = 8.3 Hz), 136.4 (d,  $J$  = 5.8 Hz), 130.5, 128.9 (d,  $J$  = 2.5 Hz), 128.2 (d,  $J$  = 4.4 Hz), 127.3 (d,  $J$  = 3.5 Hz), 125.8 (d,  $J$  = 2.9 Hz), 117.6, 114.51, 63.3 (d,  $J$  = 7.2 Hz), 62.2 (d,  $J$  = 7.6 Hz), 59.5 (d,  $J$  = 160 Hz), 55.6, 44.6, 26.1, 16.5 (d,  $J$  = 5.5 Hz), 16.4 ppm (d,  $J$  = 5.9 Hz).; HRMS (ESI): calcd. for  $\text{C}_{20}\text{H}_{26}\text{NNaO}_3\text{P}$   $[\text{M} + \text{Na}]^+$  398.1497; found 398.1492.

**Diethyl(6,7-dimethoxy-2-(4-methoxyphenyl)-1,2,3,4-tetrahydroisoquinolin-1-yl)phosphonate**

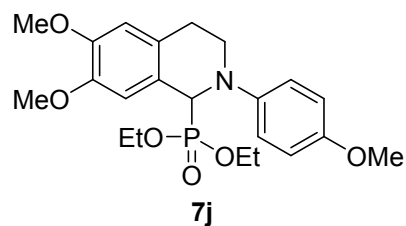

Purified by column chromatography on silica gel (eluting with hexane/ethyl acetate = 3:1,  $R_f$  = 0.2). Orange oil.  $^1\text{H}$  NMR (400 MHz,  $\text{CDCl}_3$ )  $\delta$  = 6.94 (d,  $J$  = 1.9 Hz, 1H), 6.91 (d,  $J$  = 9.1 Hz, 2H), 6.80 (d,  $J$  = 9.1 Hz, 2H), 6.60 (s, 1H), 4.92 (d,  $J$  = 21.7 Hz, 1H), 4.24 – 3.92 (m, 6H), 3.85 (d,  $J$  = 9.4 Hz, 6H), 3.74 (s, 3H), 2.84 (m, 1H), 2.76 – 2.63 (m, 1H), 1.28 (t,  $J$  = 7.0 Hz, 3H), 1.18 (t,  $J$  = 7.0 Hz, 3H) ppm;  $^{13}\text{C}$  NMR (100 MHz,  $\text{CDCl}_3$ )  $\delta$  = 153.3, 148.2 (d,  $J$  = 3.6 Hz), 147.0 (d,  $J$  = 3.0 Hz), 144.3 (d,  $J$  = 9.8 Hz), 128.5 (d,  $J$  = 6.5 Hz), 121.8, 118.1, 115.5, 114.4, 111.6 (d,  $J$  = 2.6 Hz), 111.0 (d,  $J$  = 3.6 Hz), 63.4 (d,  $J$  = 7.1 Hz), 61.9 (d,  $J$  = 7.6 Hz), 59.8, 58.2, 55.9, 55.8, 55.6, 44.8, 25.2, 16.5 (d,  $J$  = 5.5 Hz), 16.4 ppm (d,  $J$  = 5.7 Hz); HRMS (ESI): calcd. for  $\text{C}_{22}\text{H}_{30}\text{NNaO}_6\text{P}$   $[\text{M} + \text{Na}]^+$  458.1708; found 458.1703.

[1] Z. Li, C.-J. Li, *J. Am. Chem. Soc.* **2005**, 127, 3672.

[2] P. Liu,; C.-Y. Zhou,; S. Xiang; C.-M. Che, *Chem. Commun.* **2010**, 46, 2739.

[3] A. Loudet,; K. Burgess, *Chem. Rev.* **2007**, 107, 4891.

[4] L. Wang, K.-q. Zhu, Q. Chen and M.-y. He, *Dyes Pigm.*, **2015**, 112, 274.

### 3. $^1\text{H}$ NMR and $^{13}\text{C}$ NMR

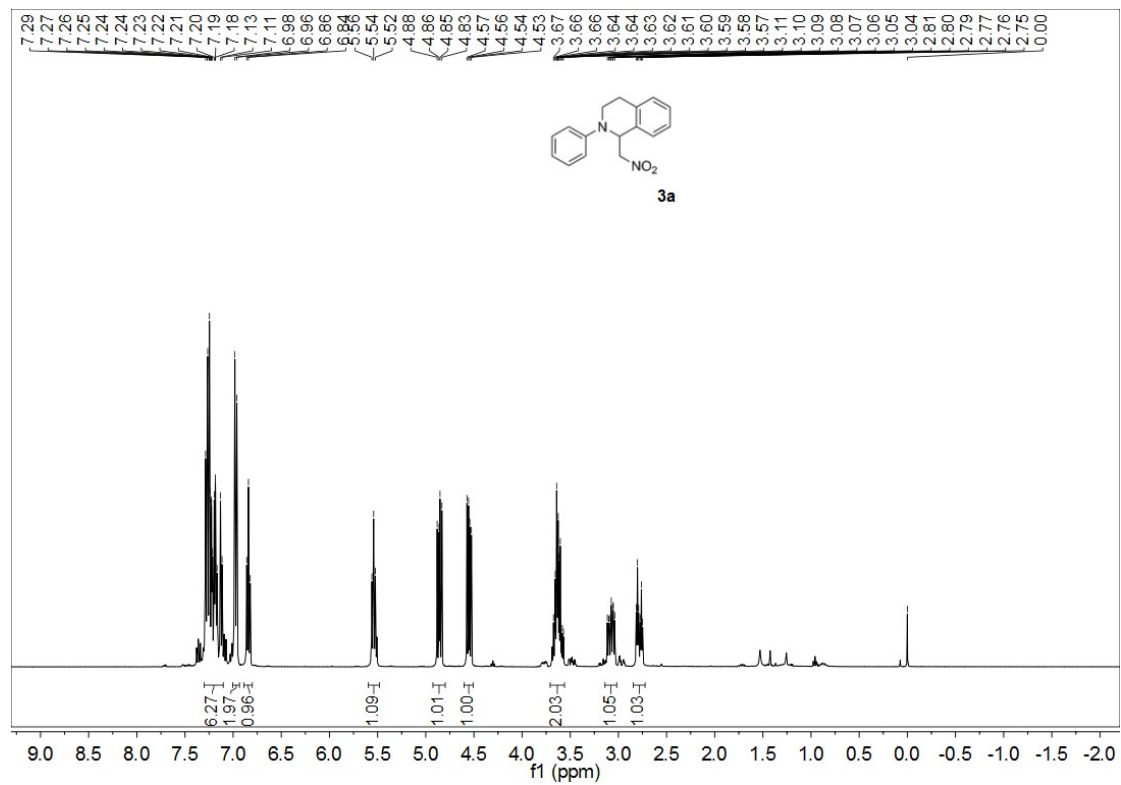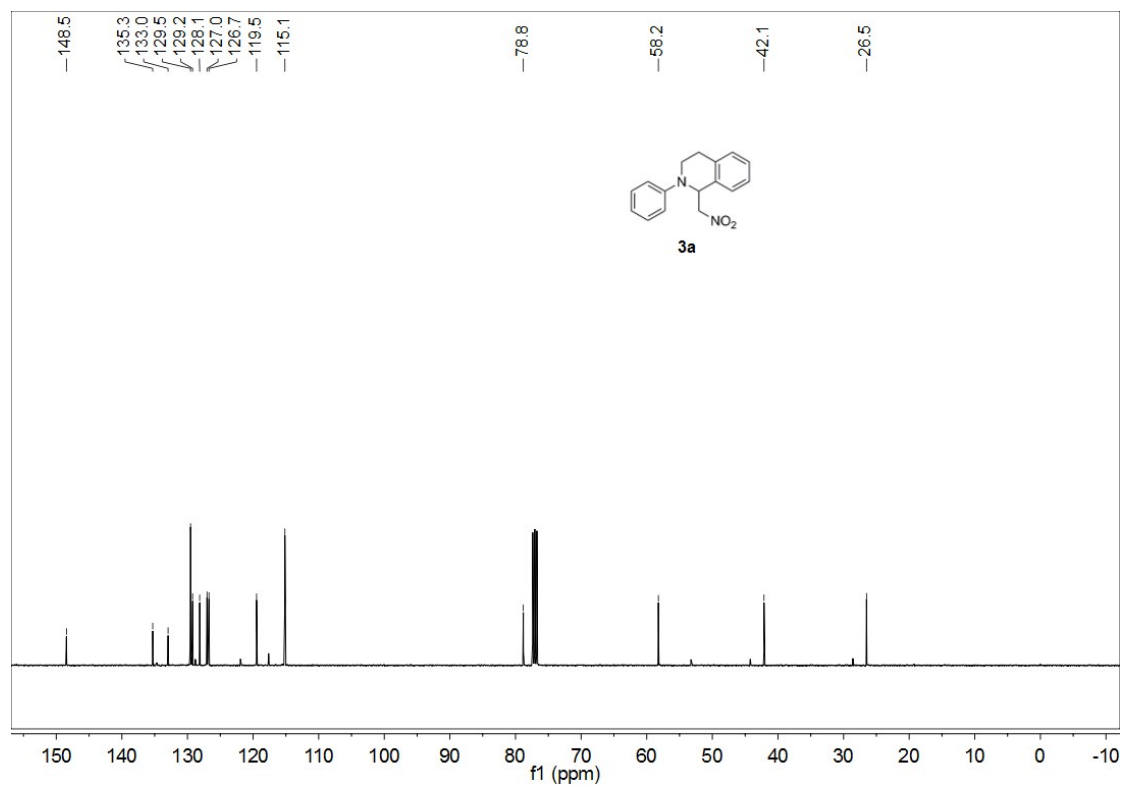

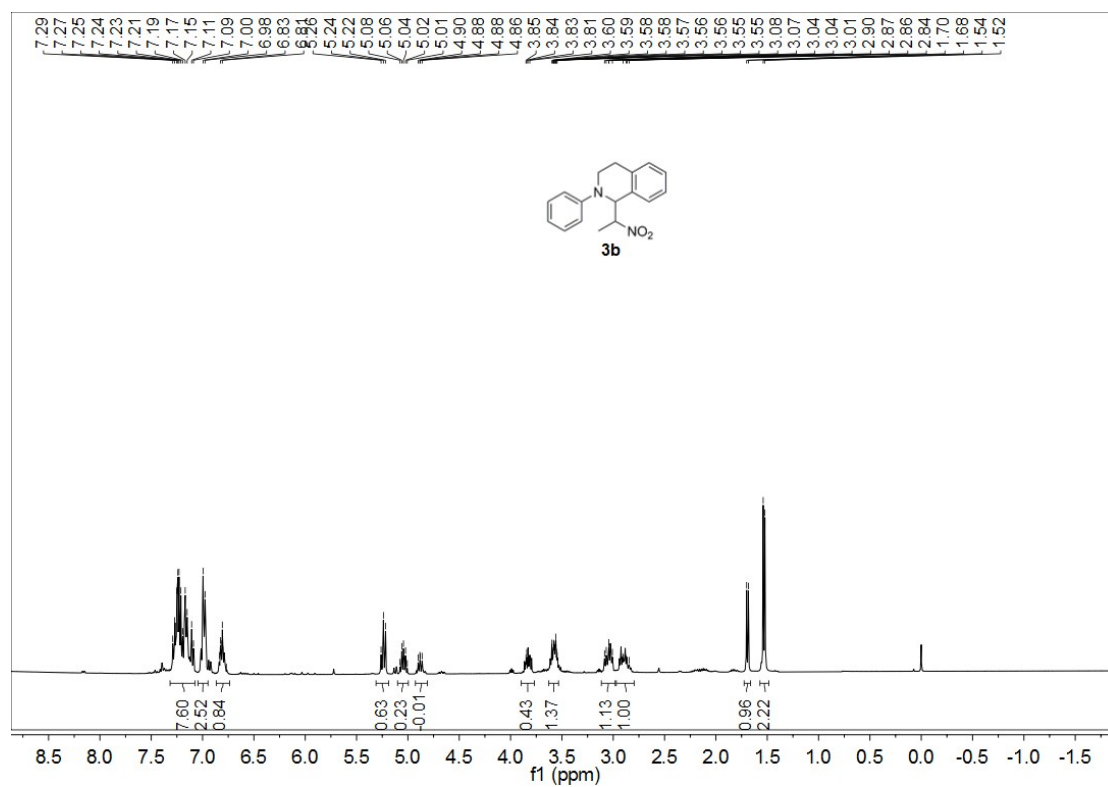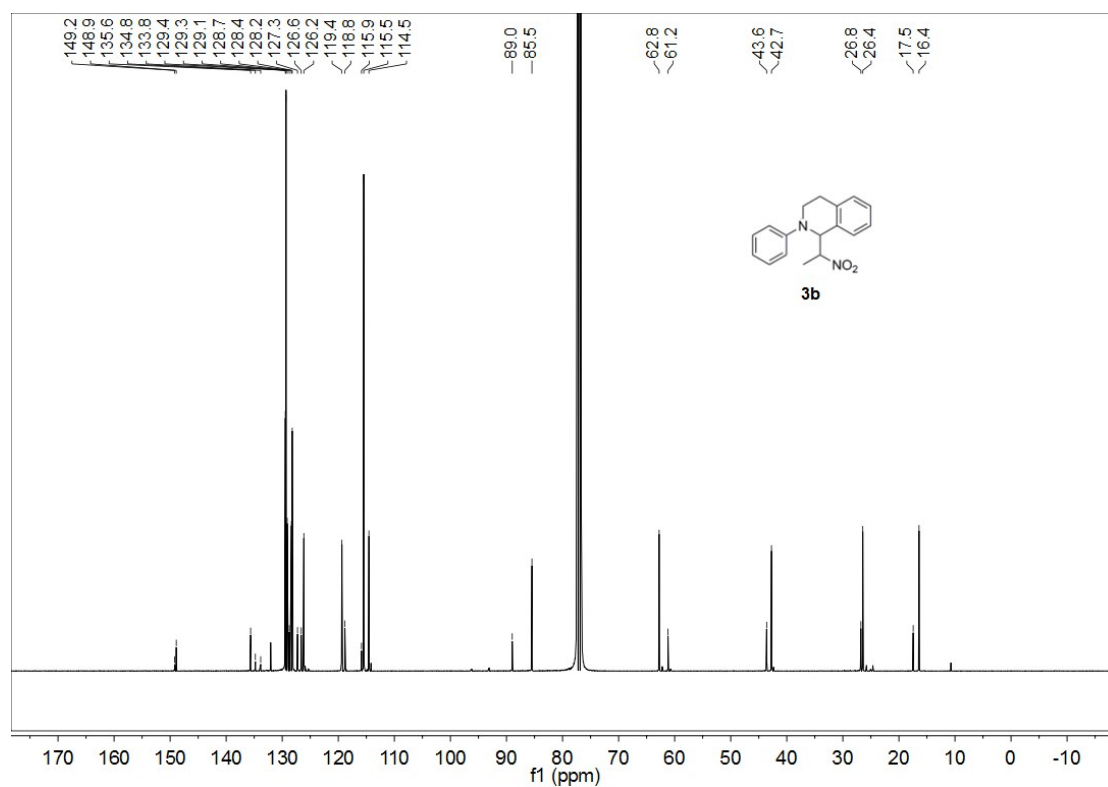

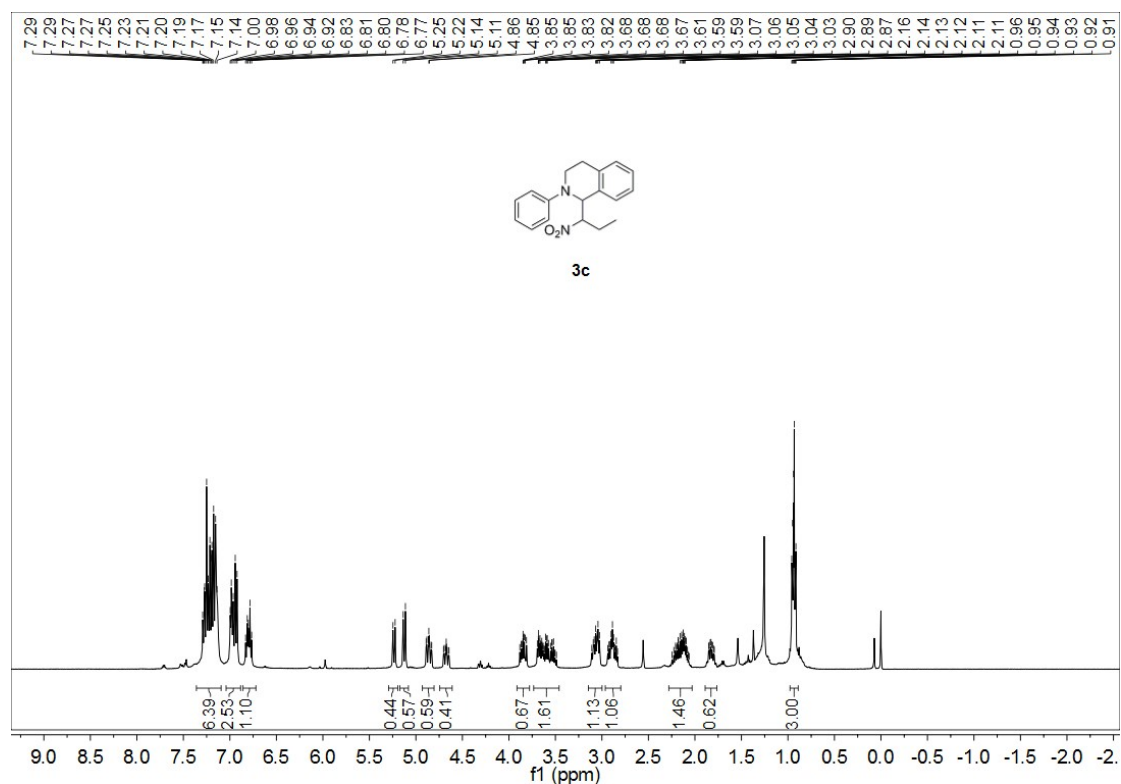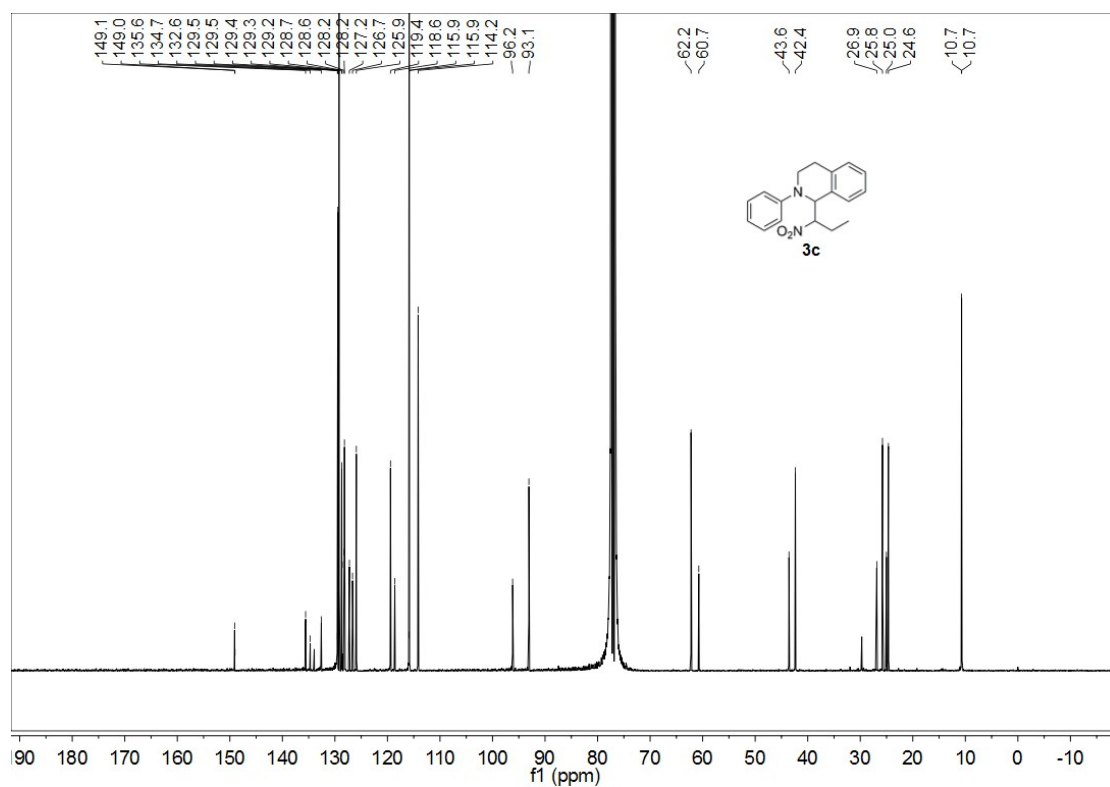

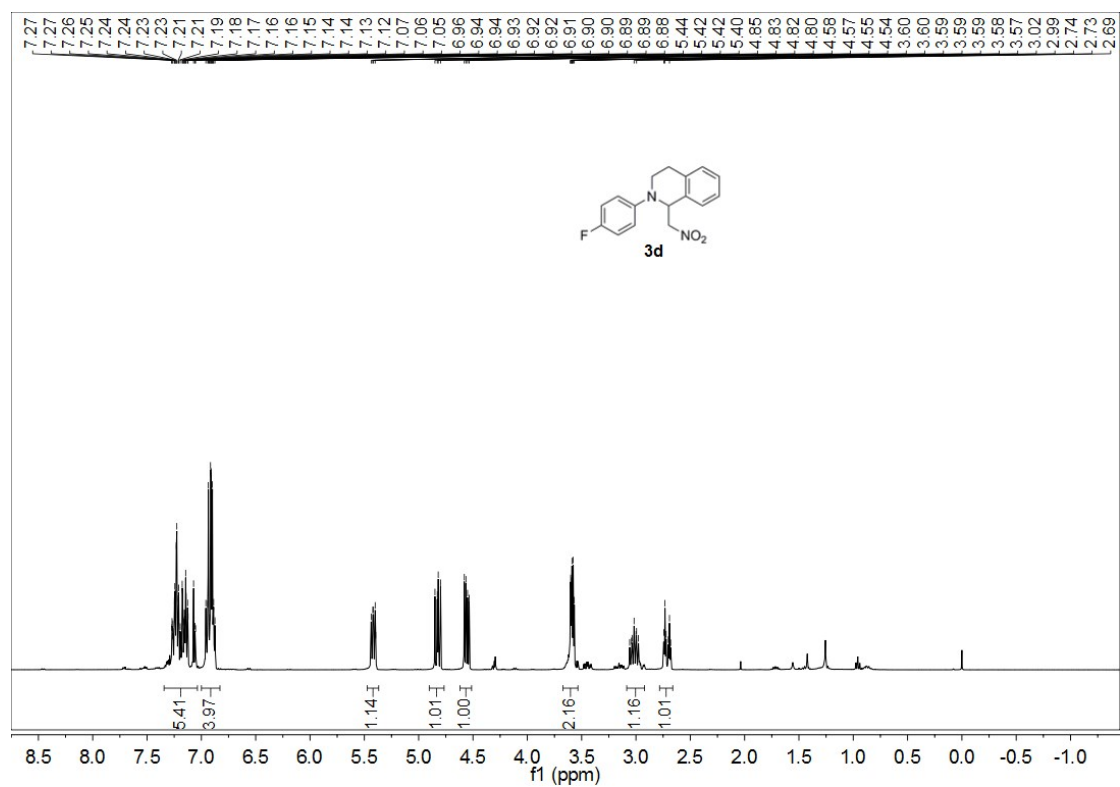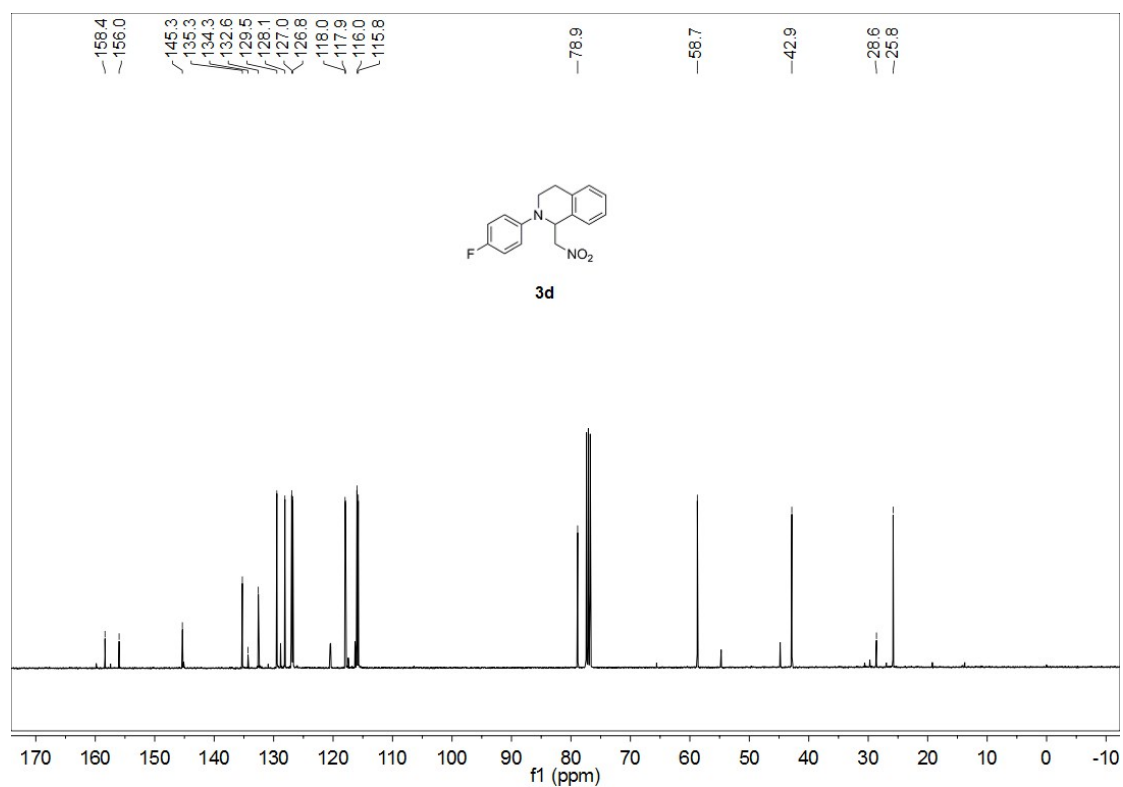

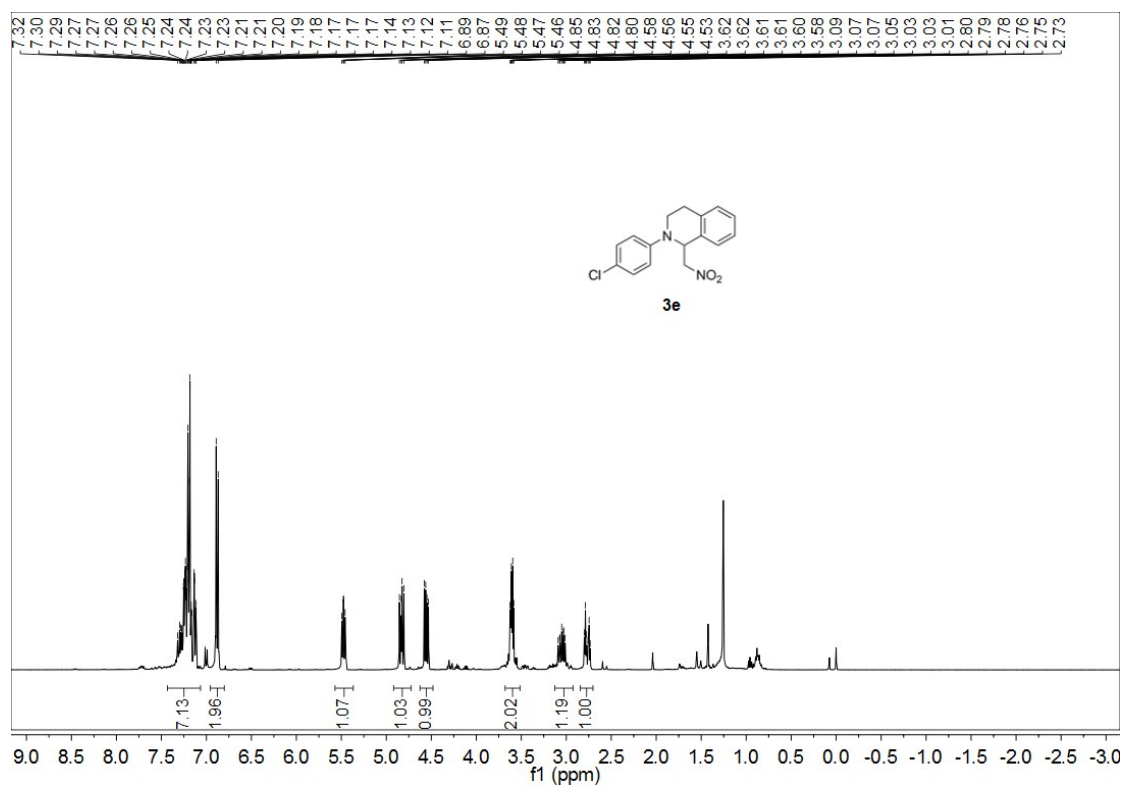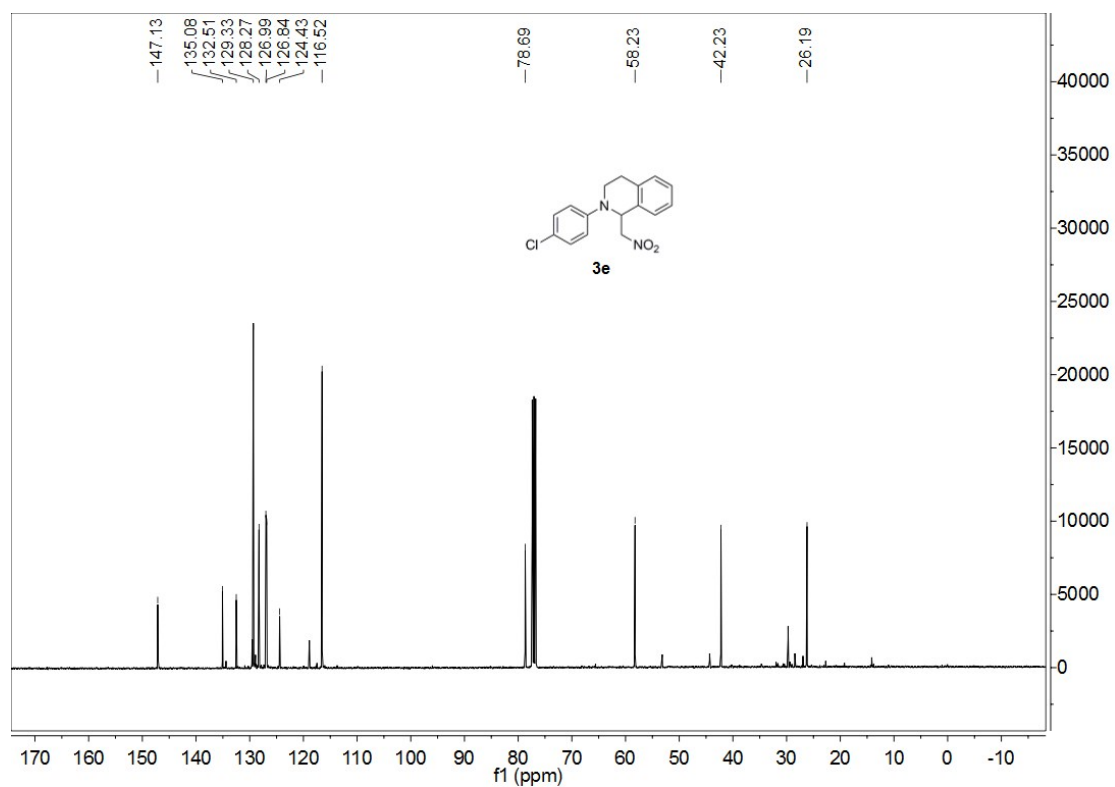



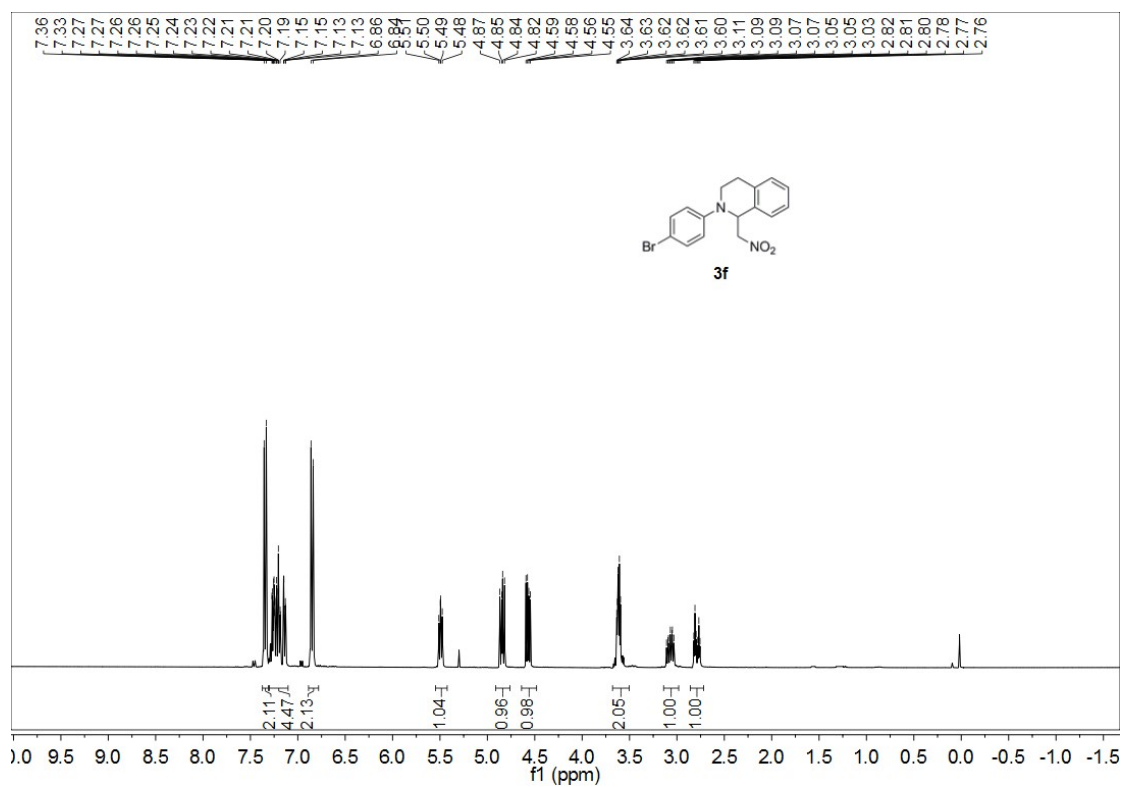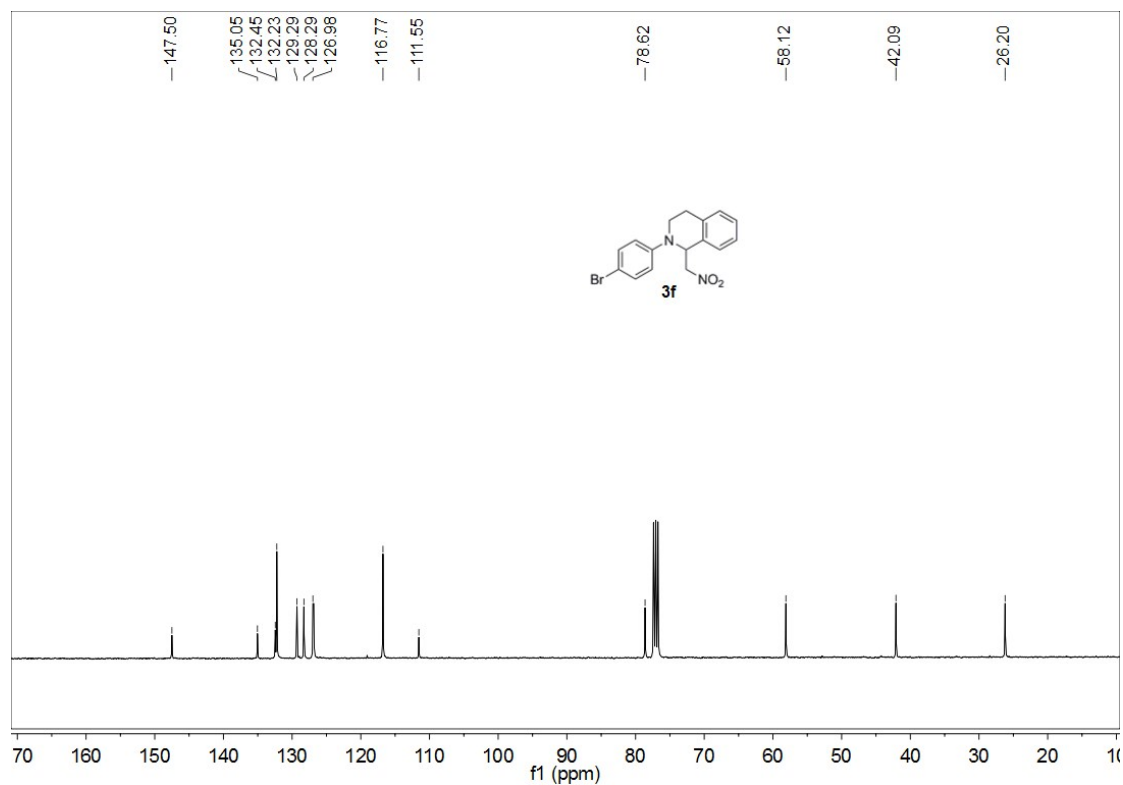

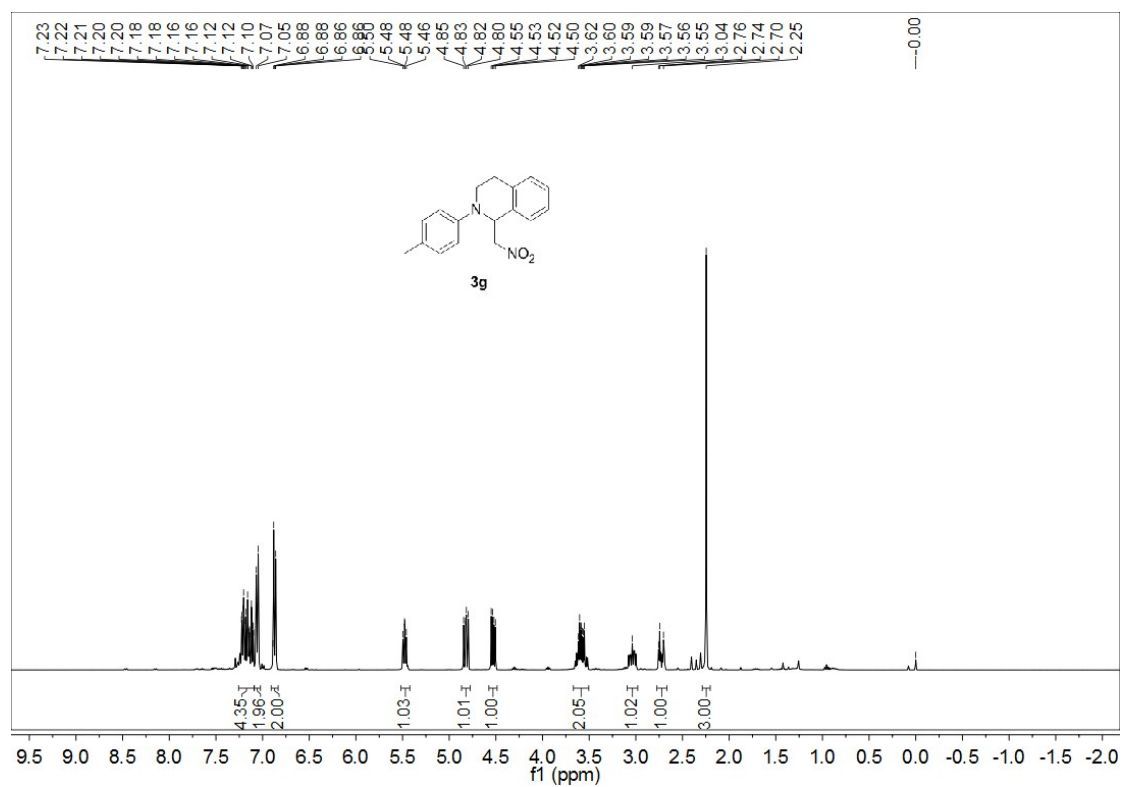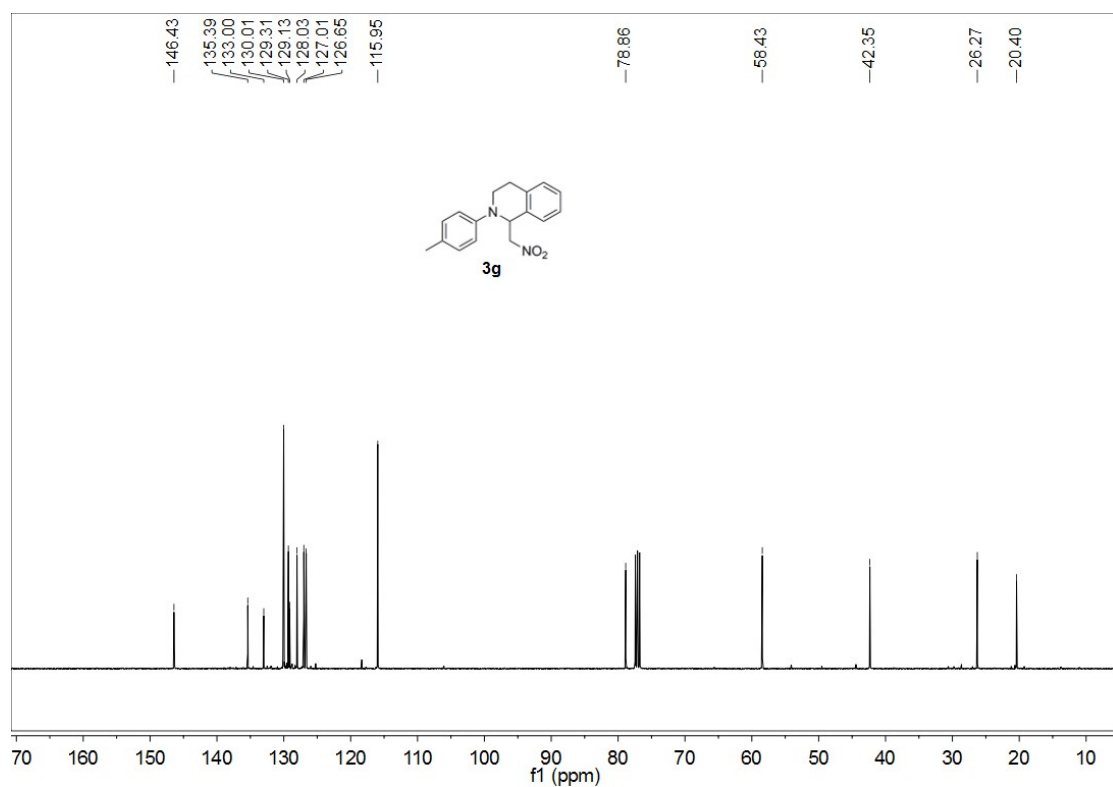

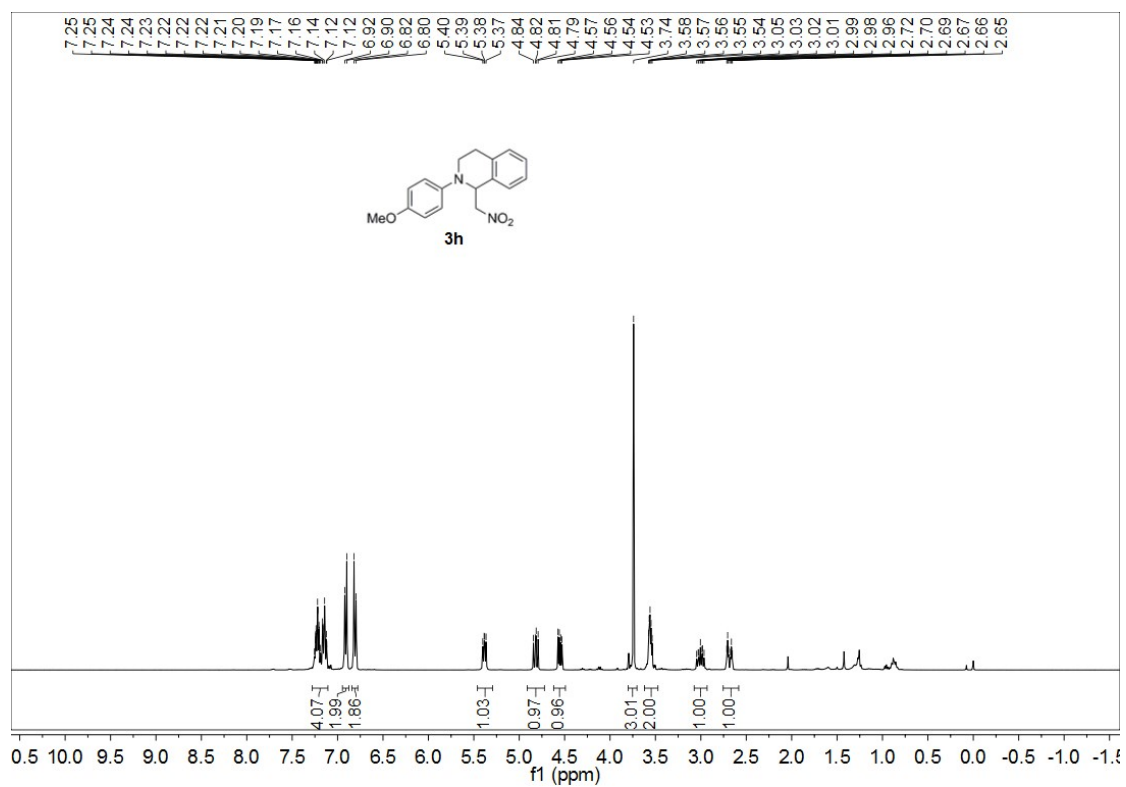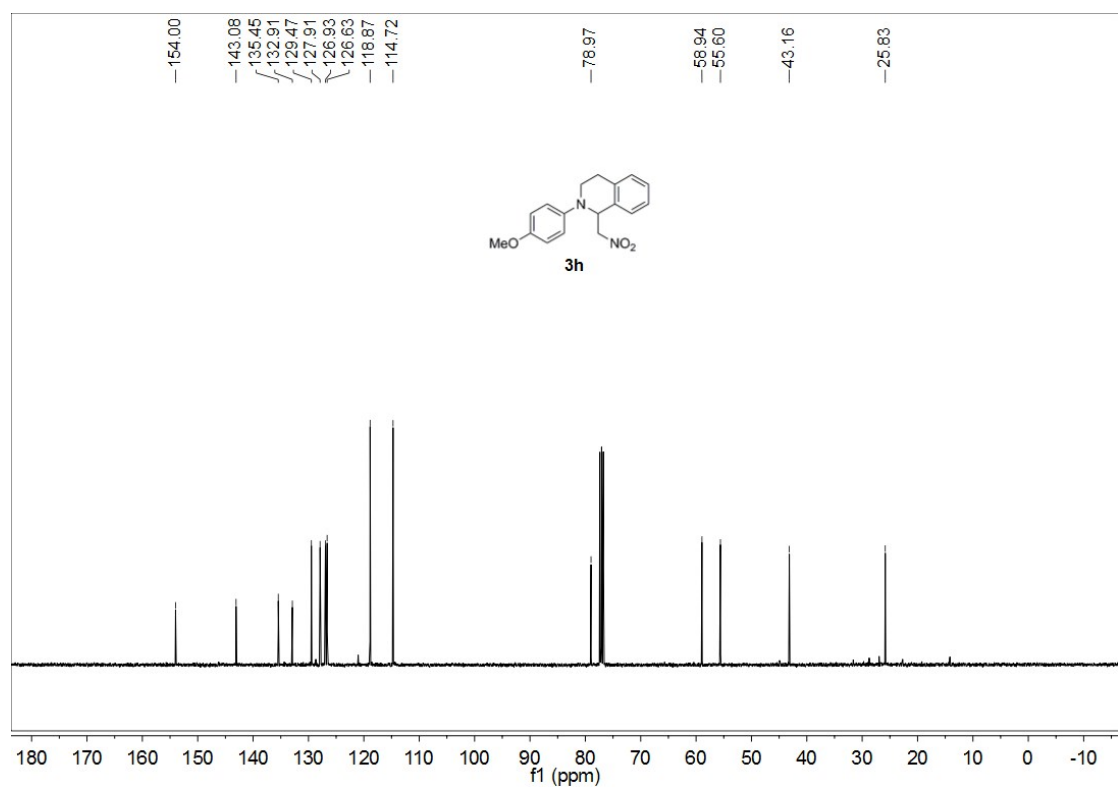

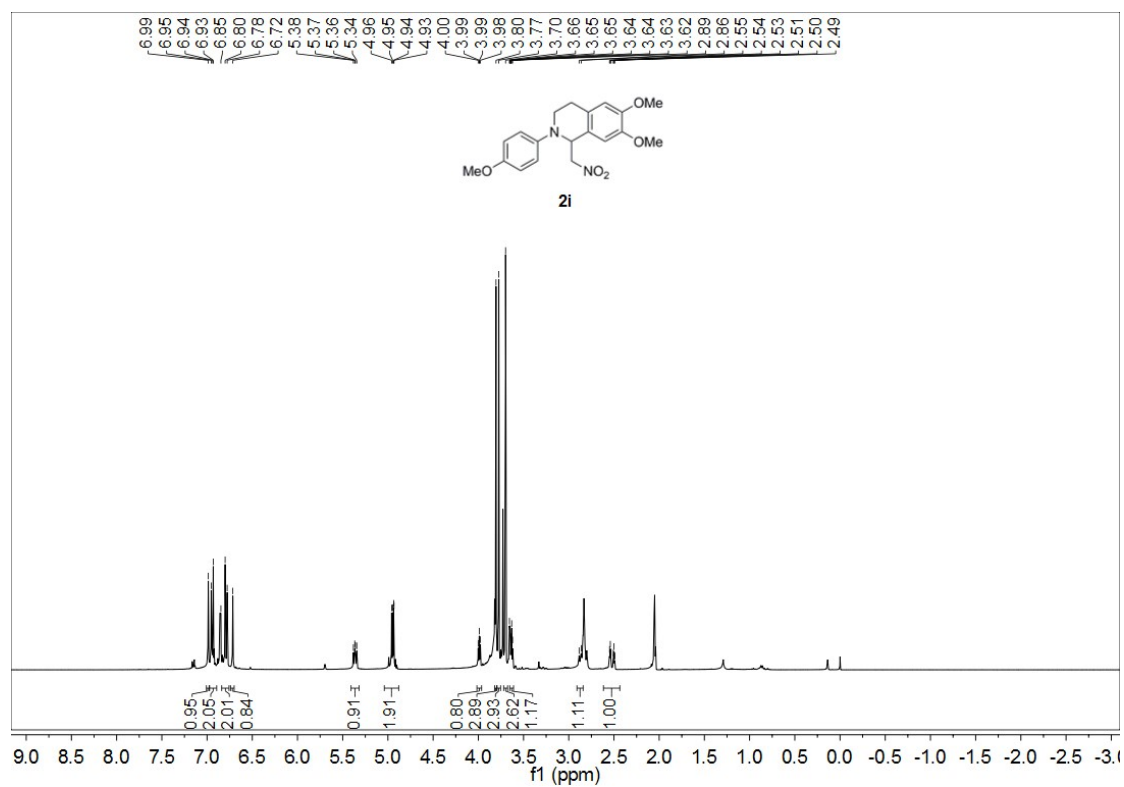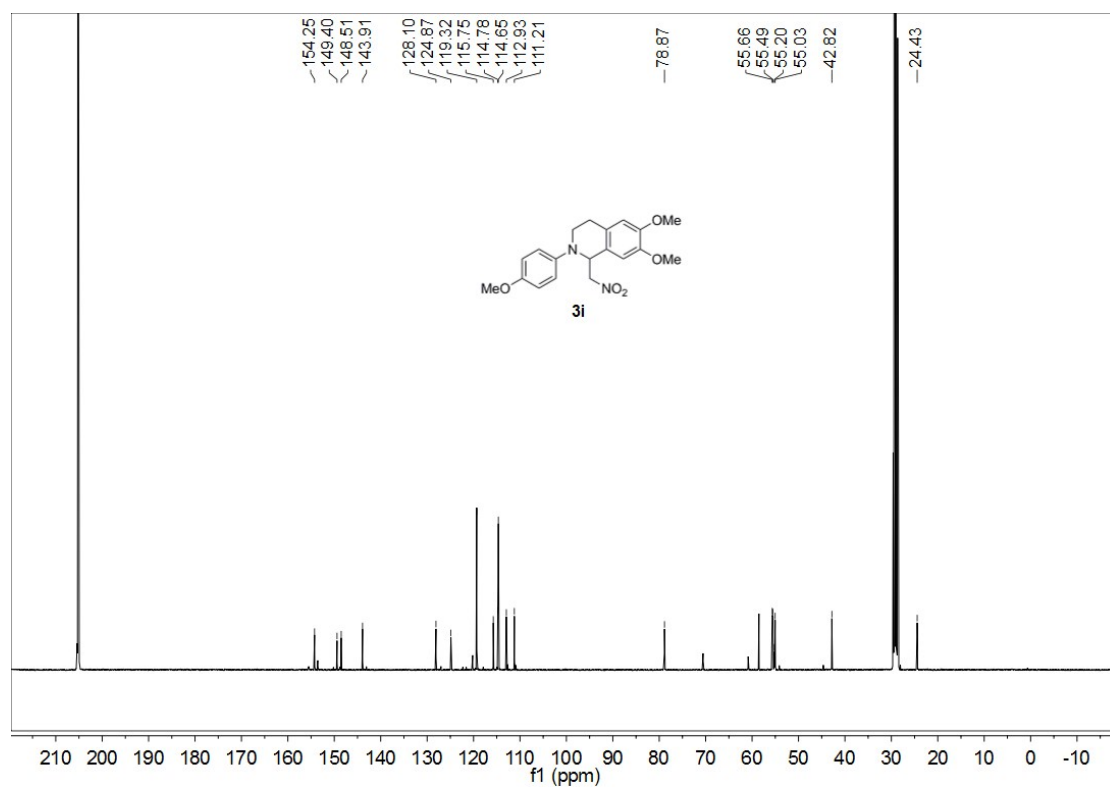

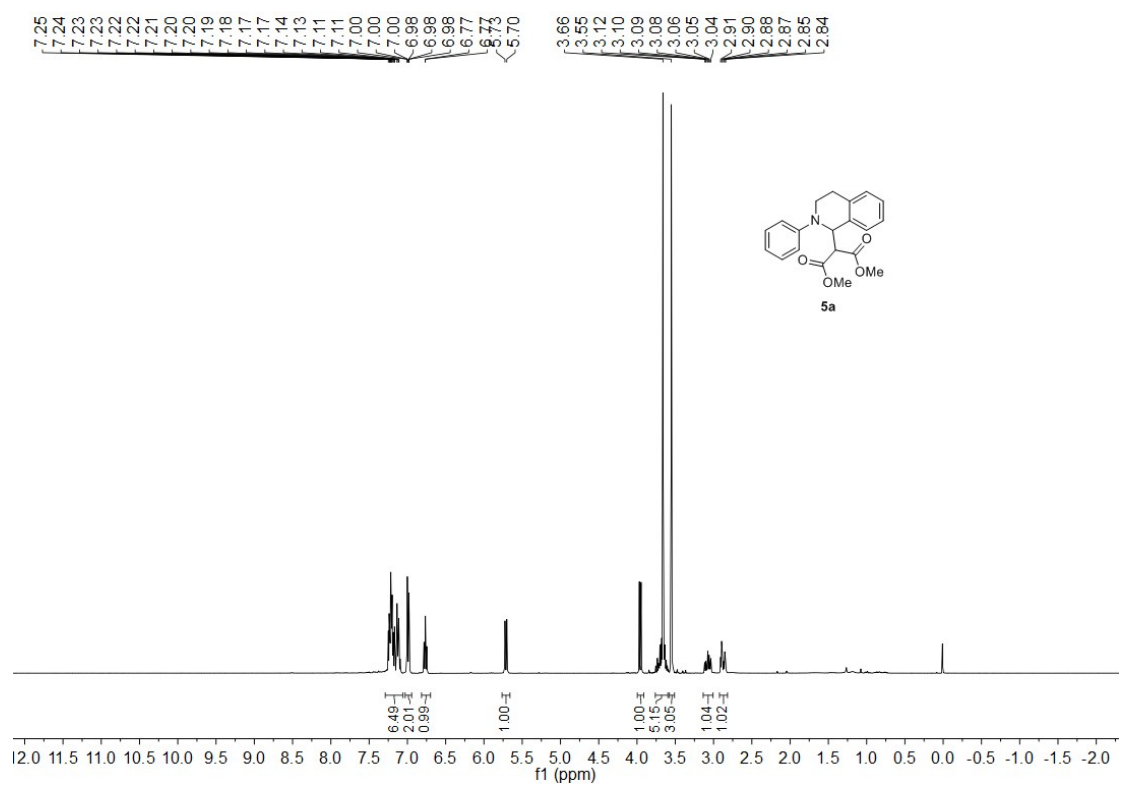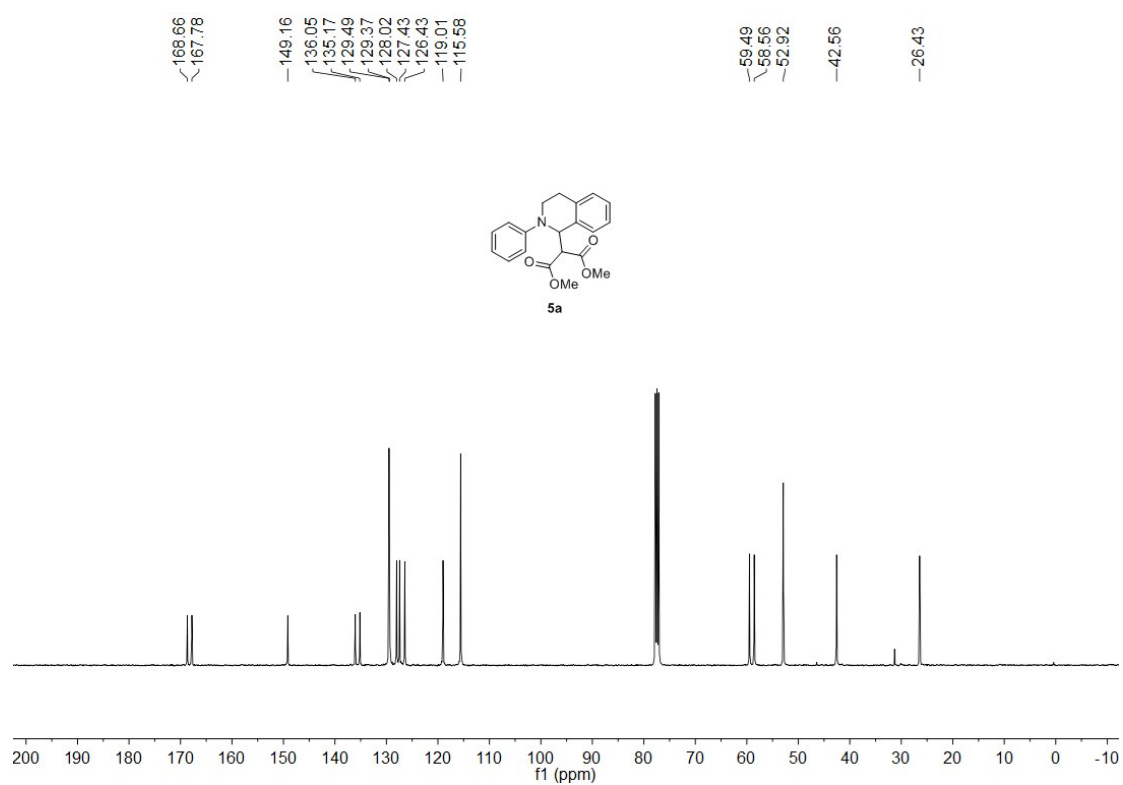

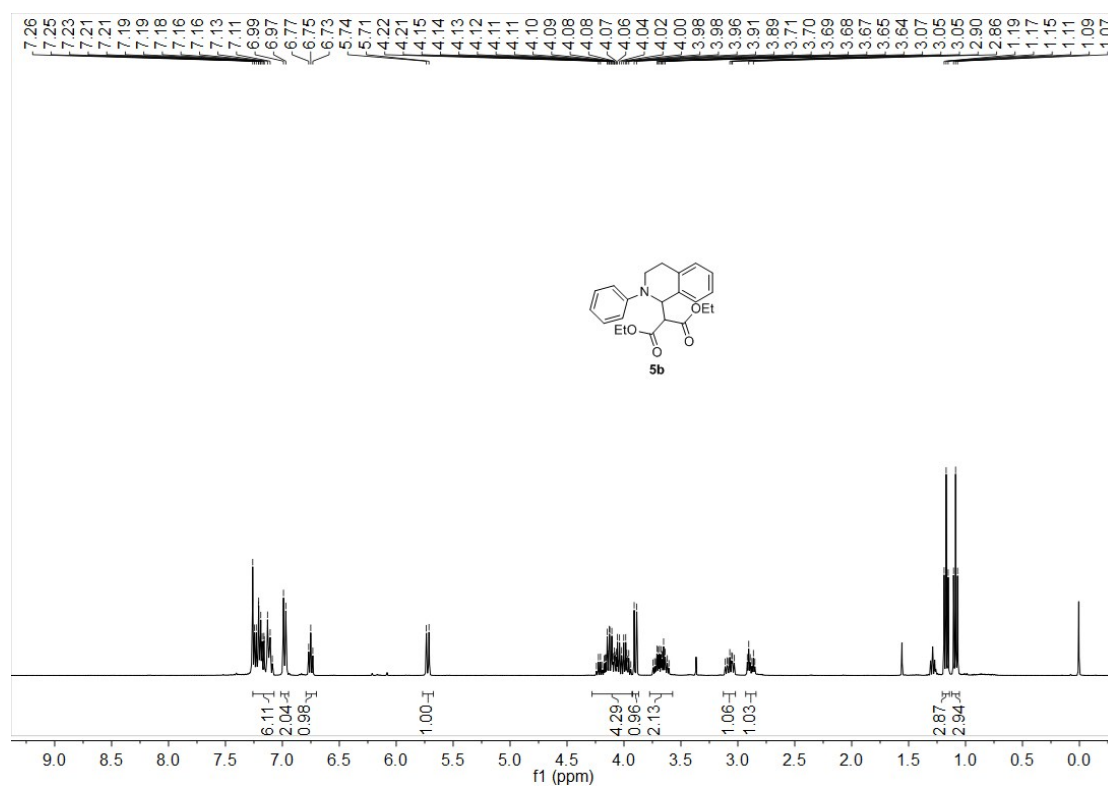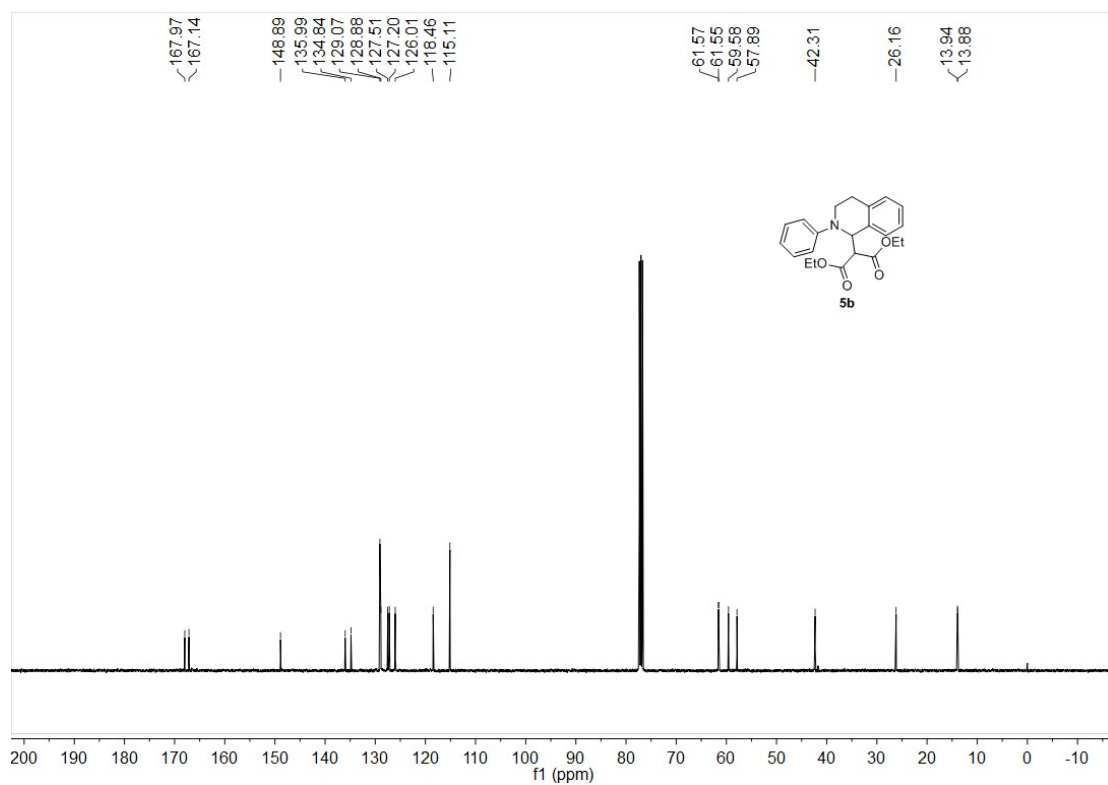

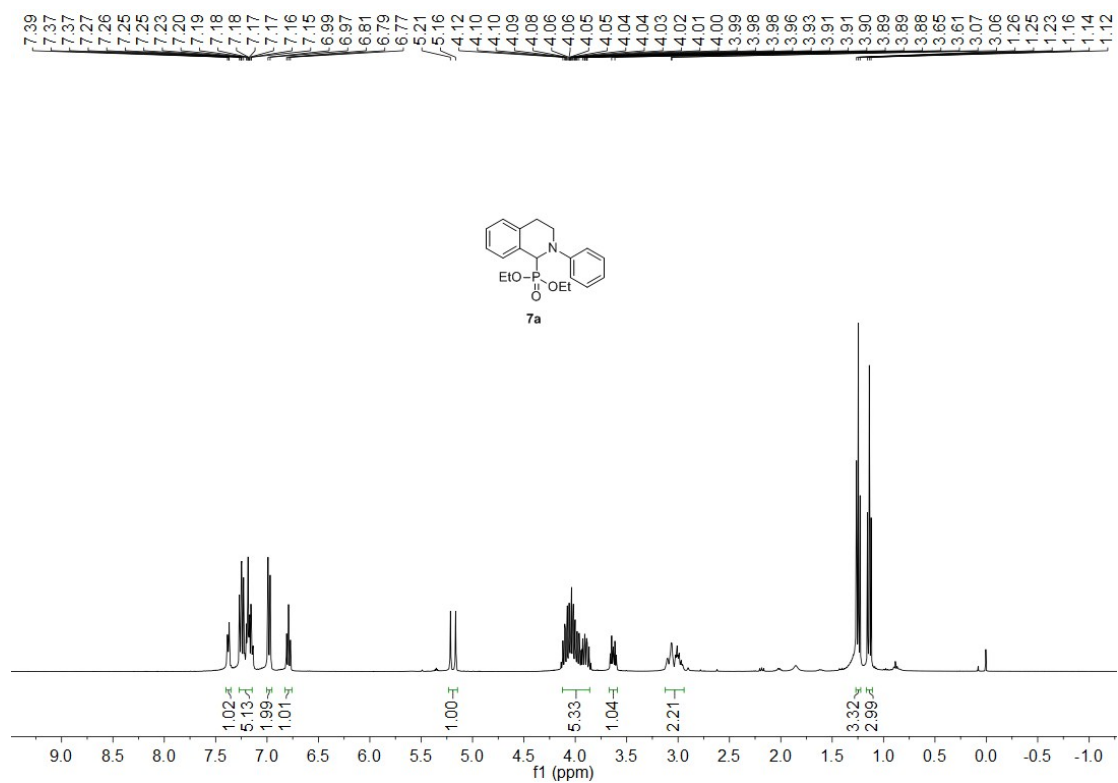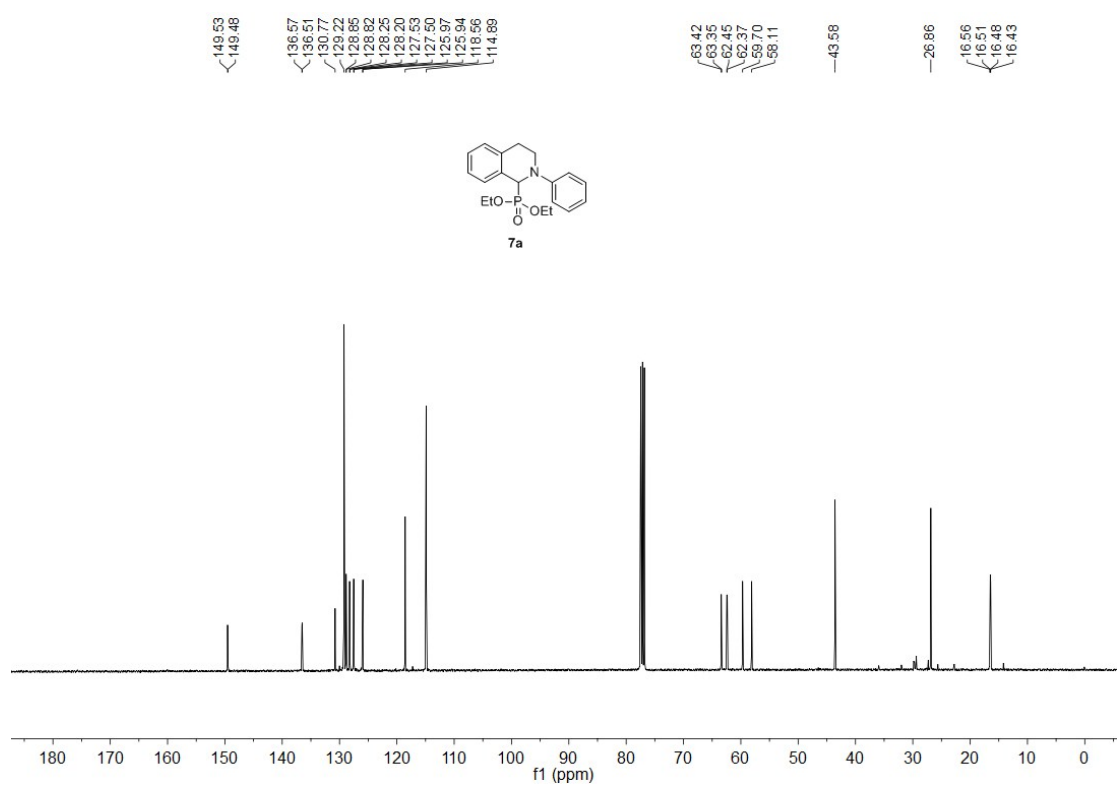

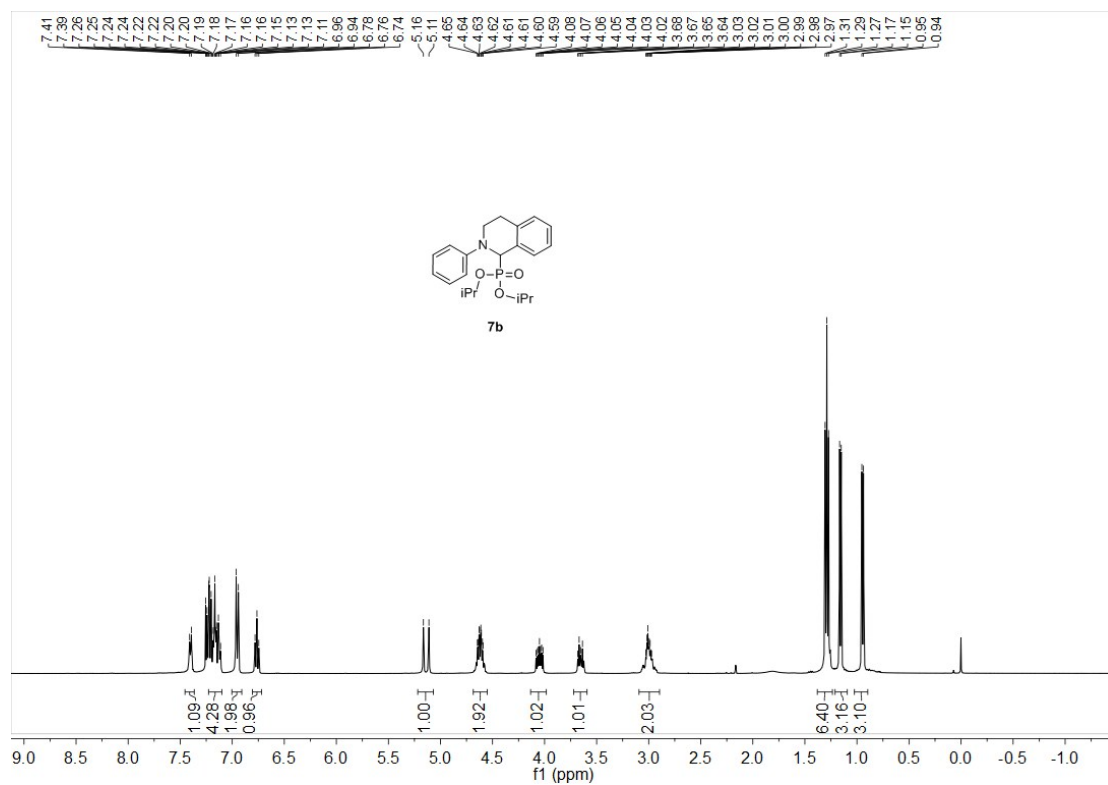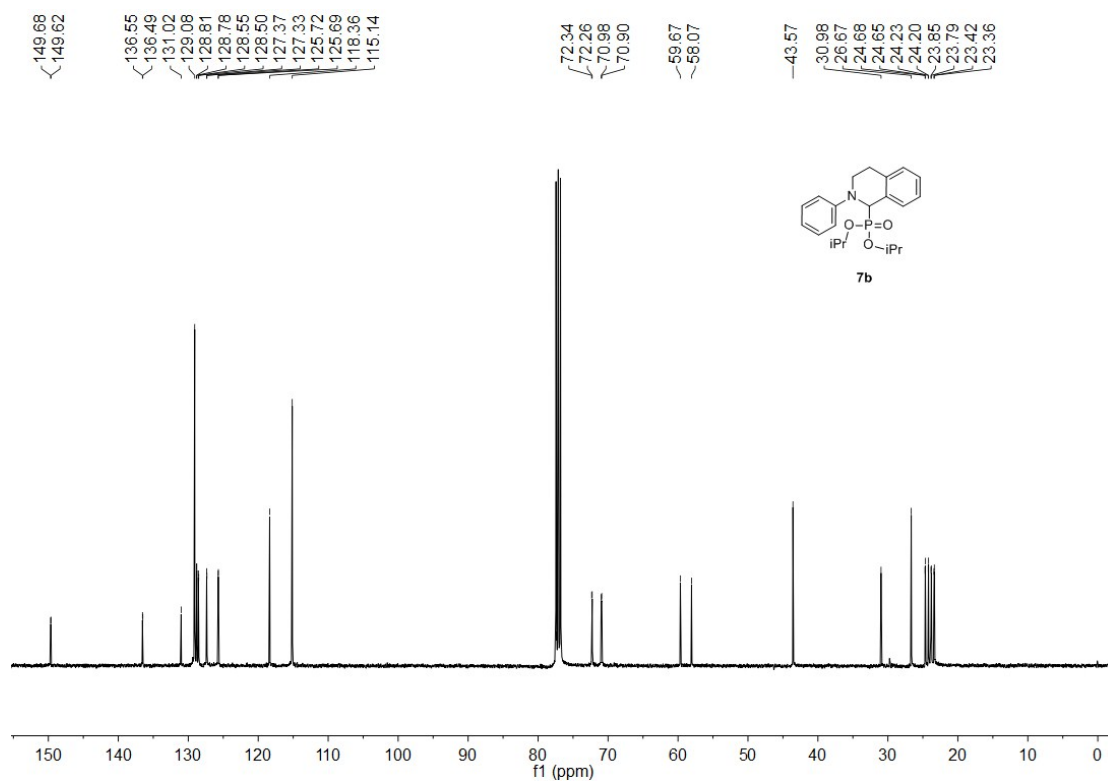



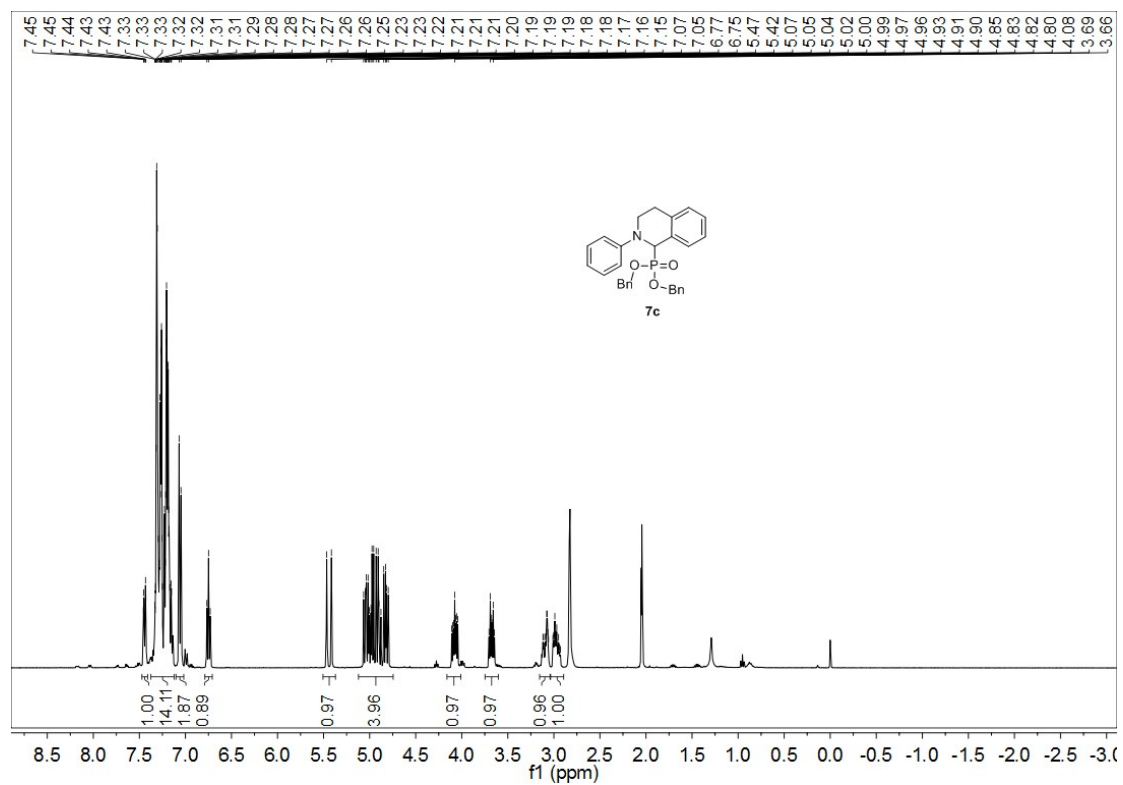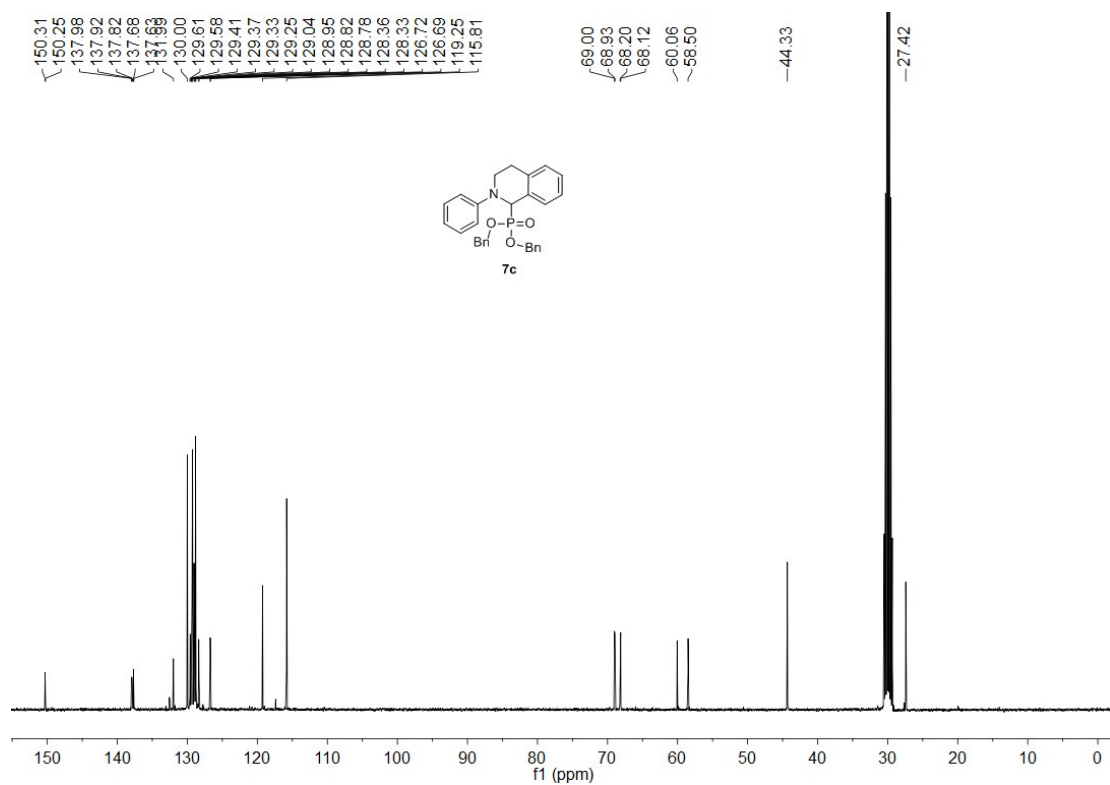

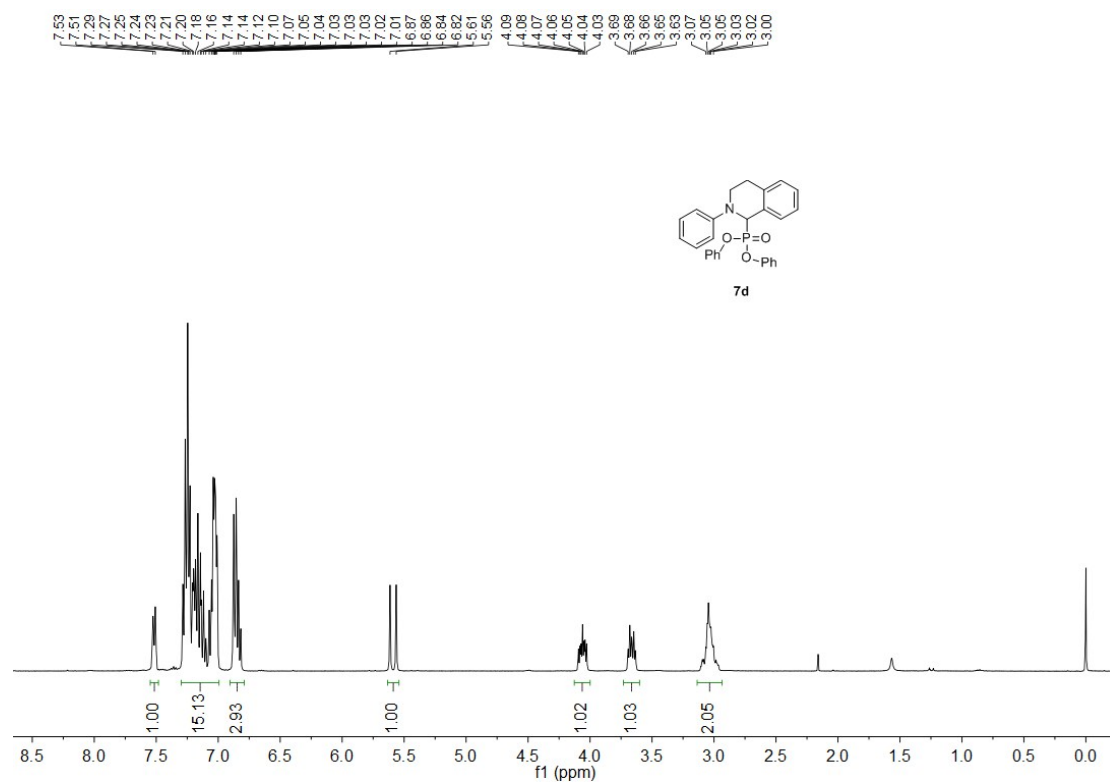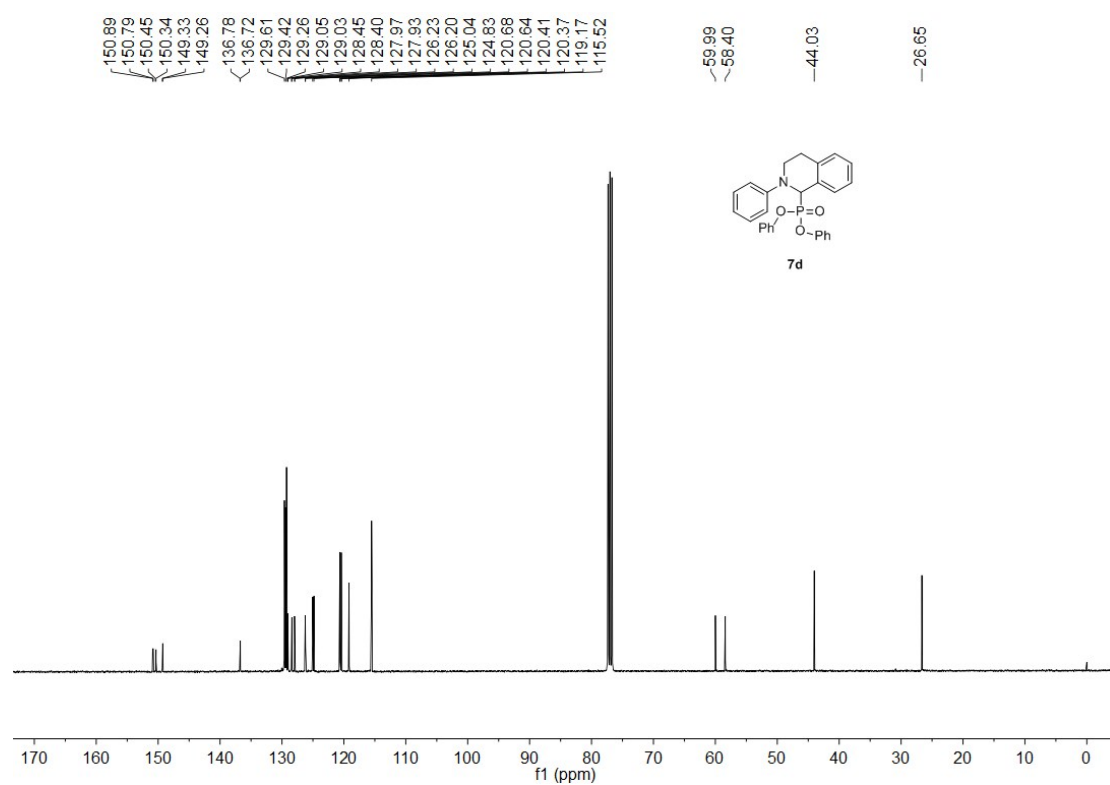

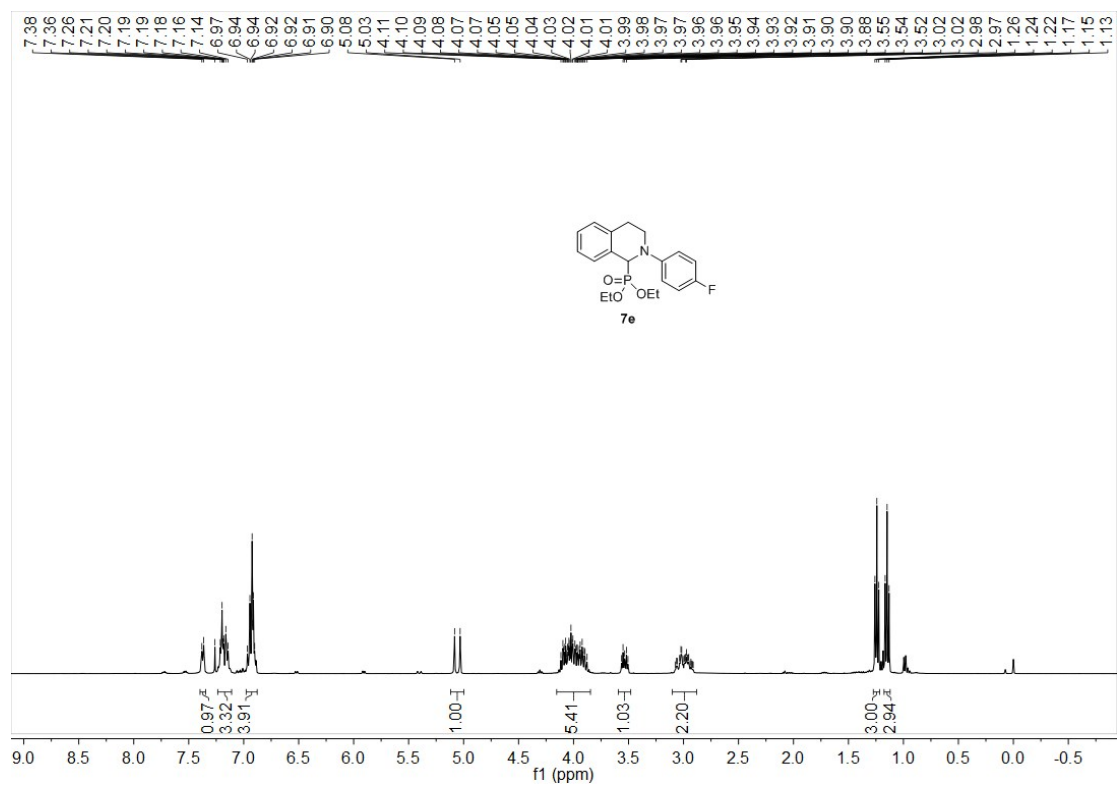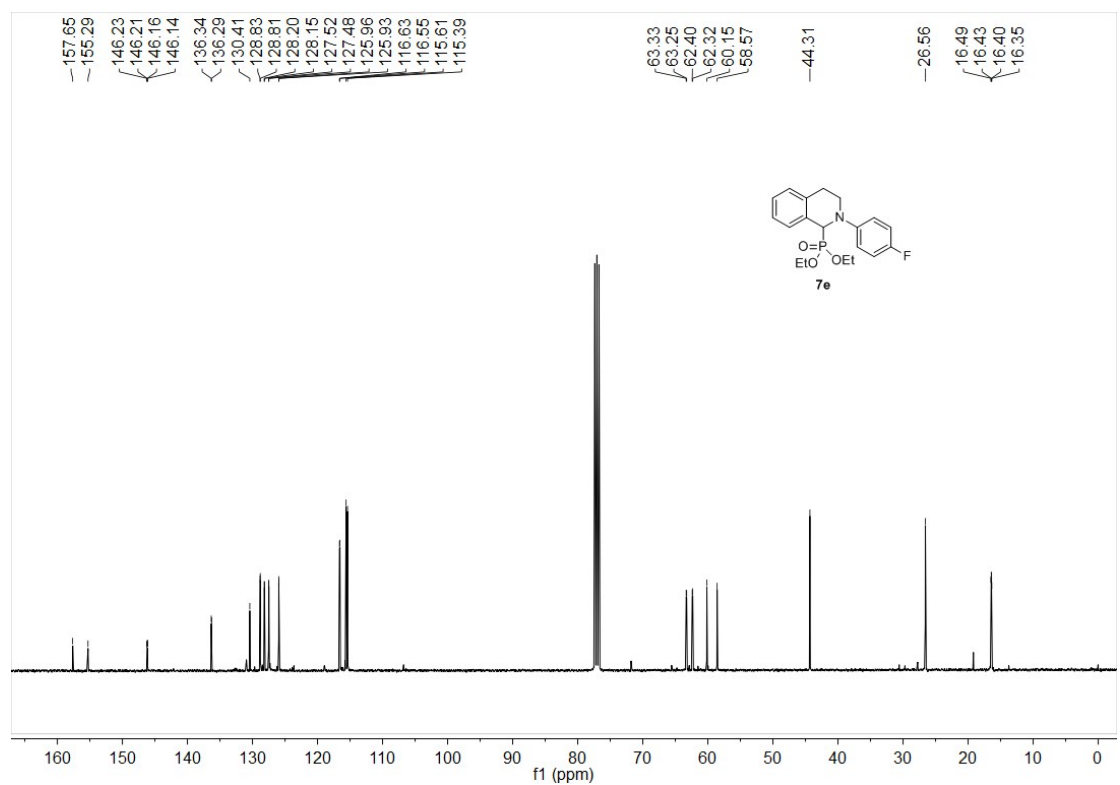

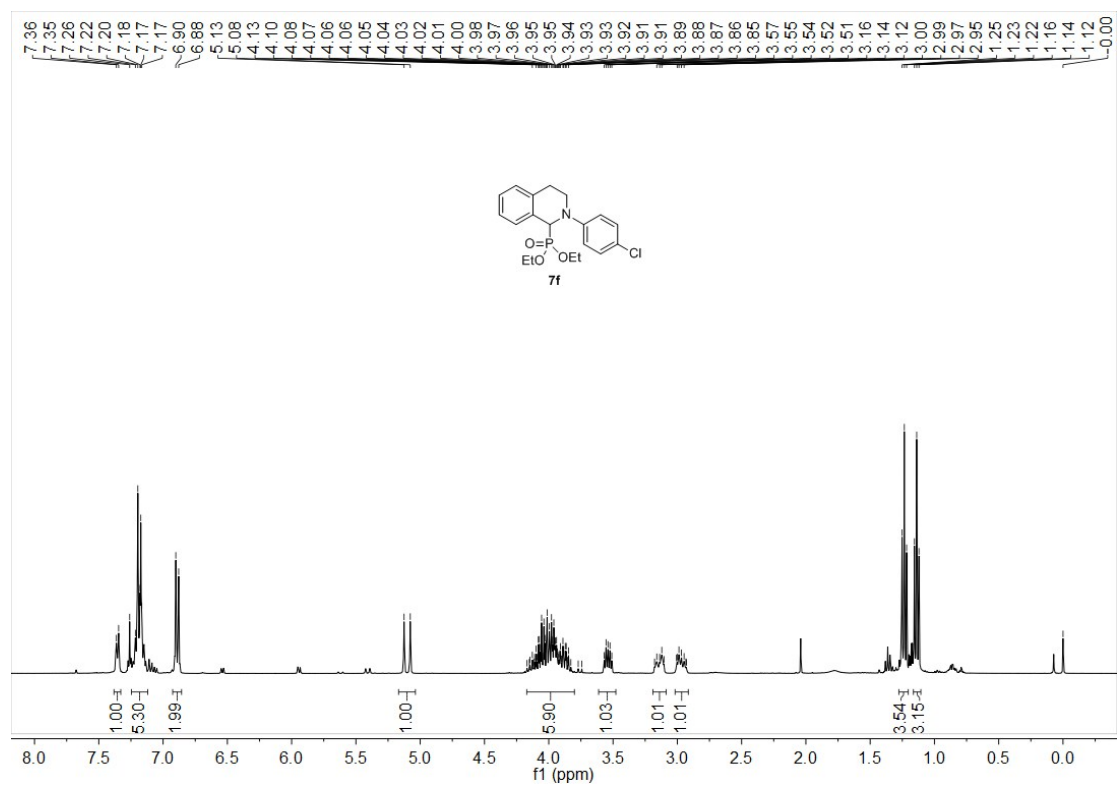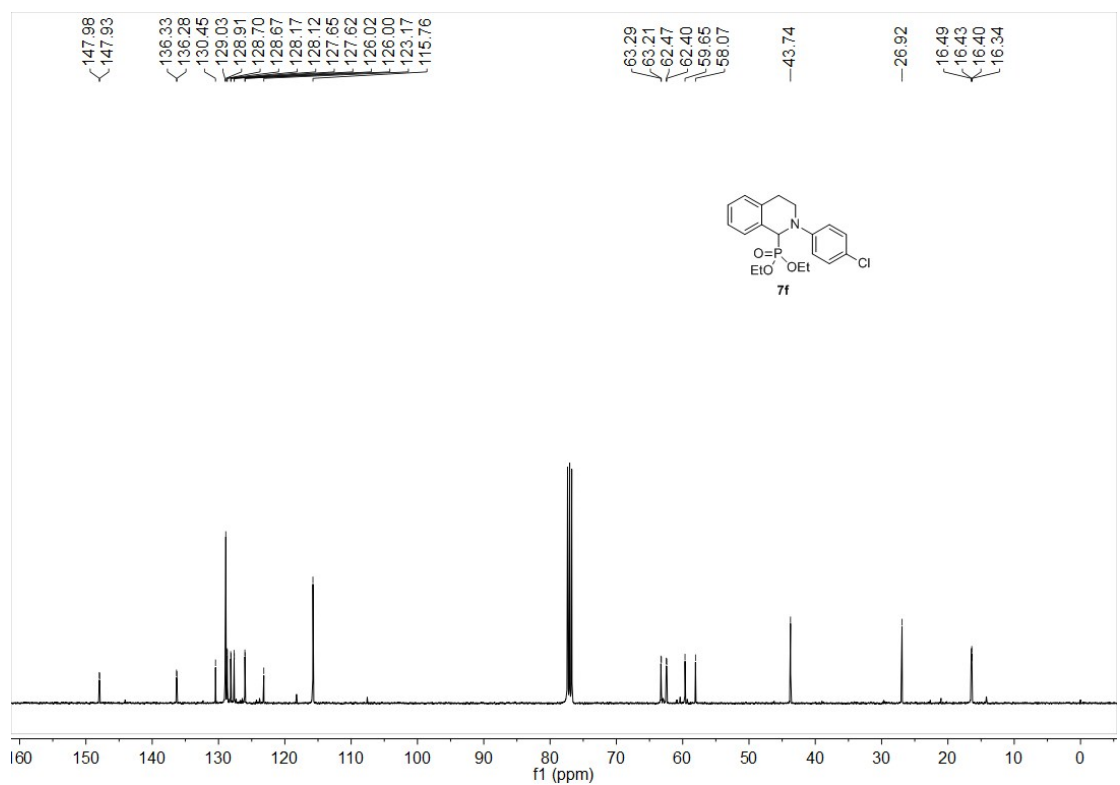

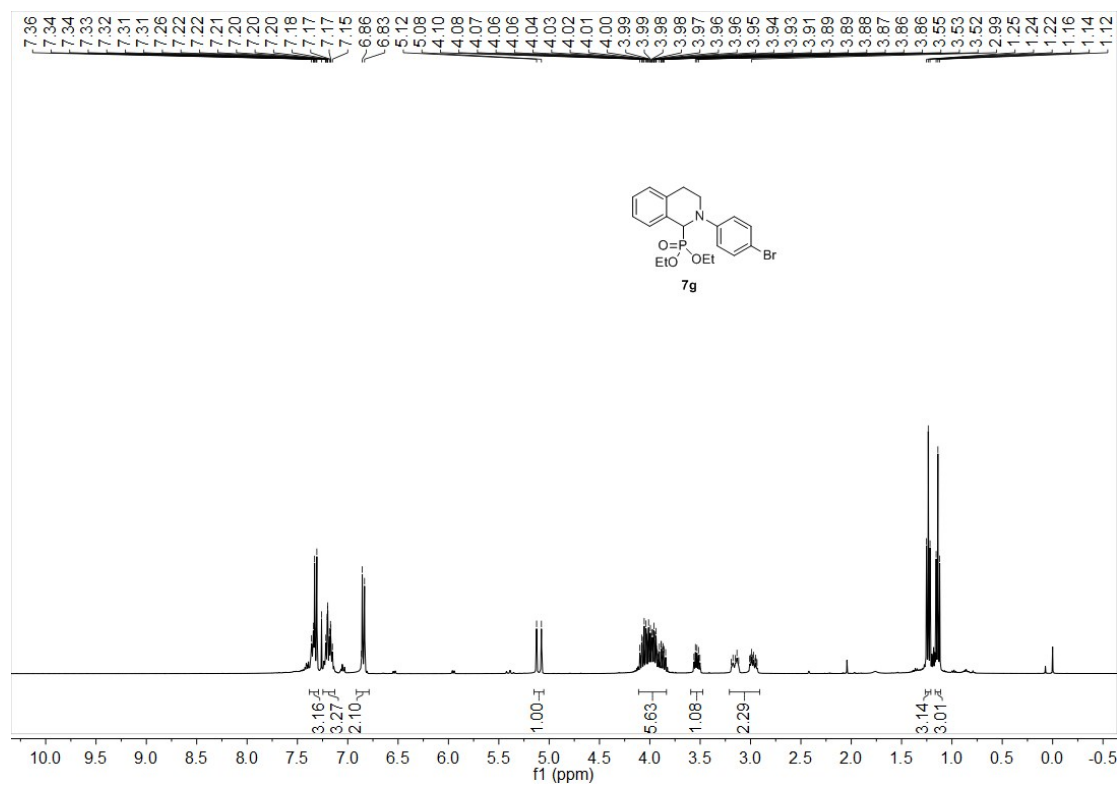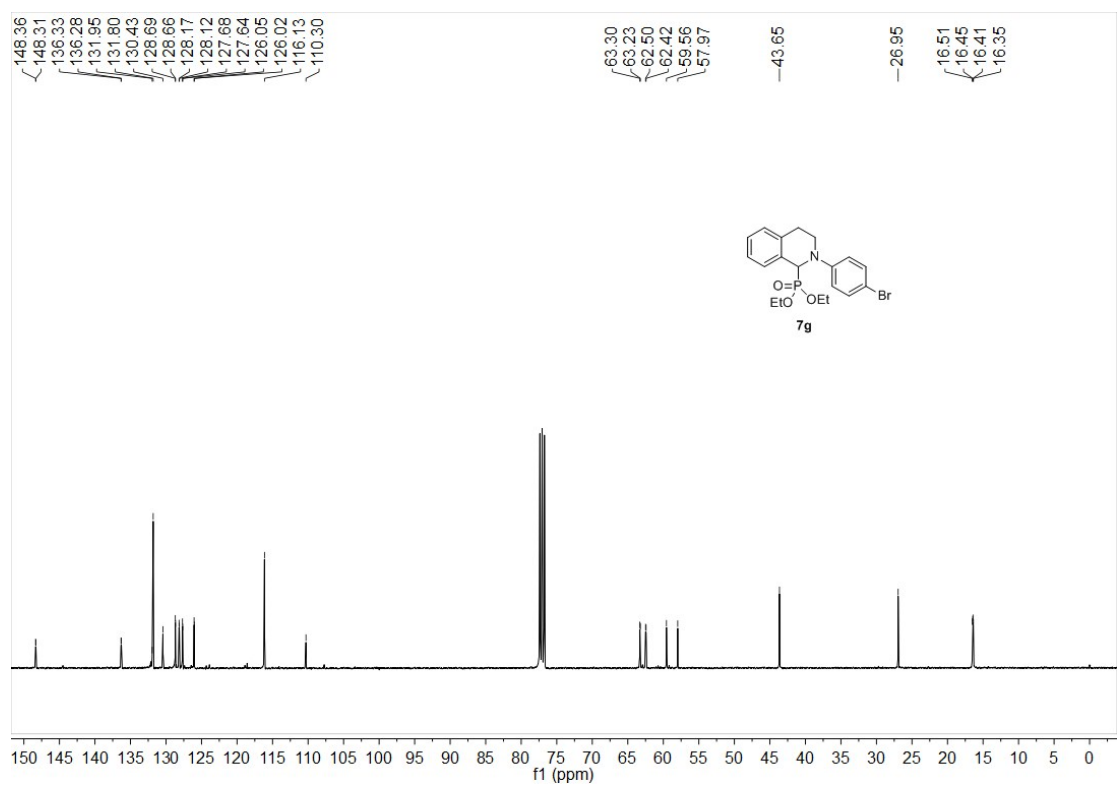

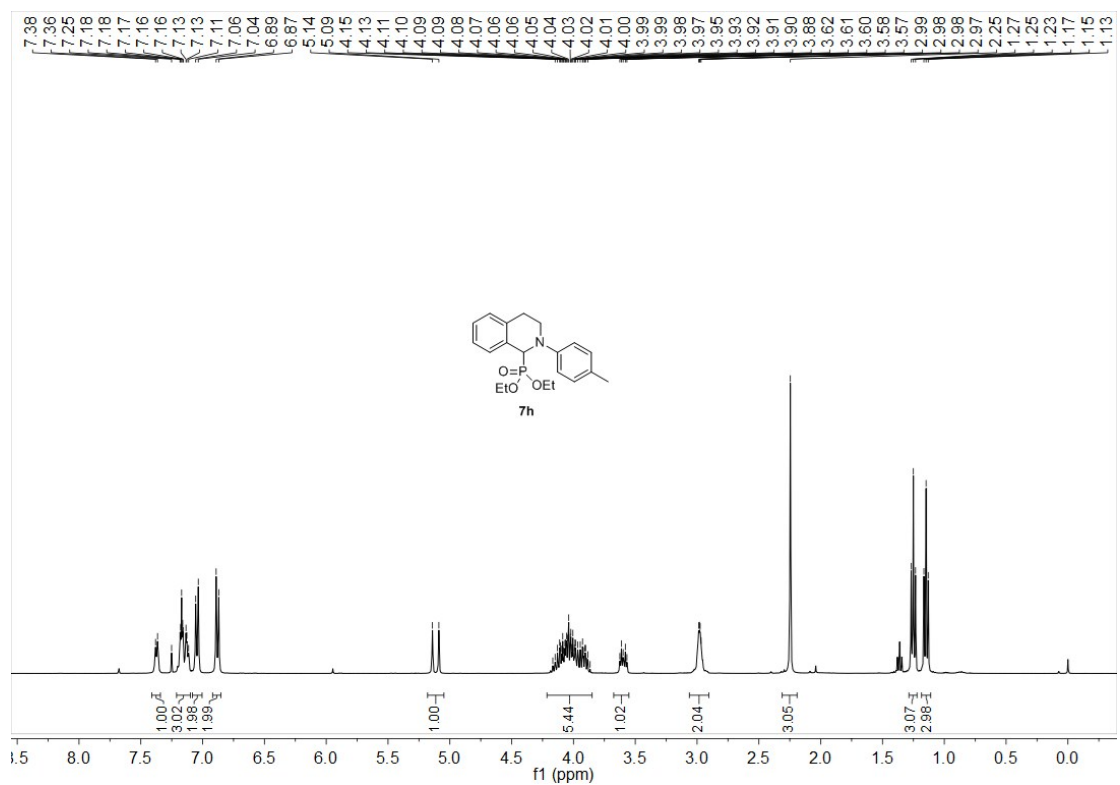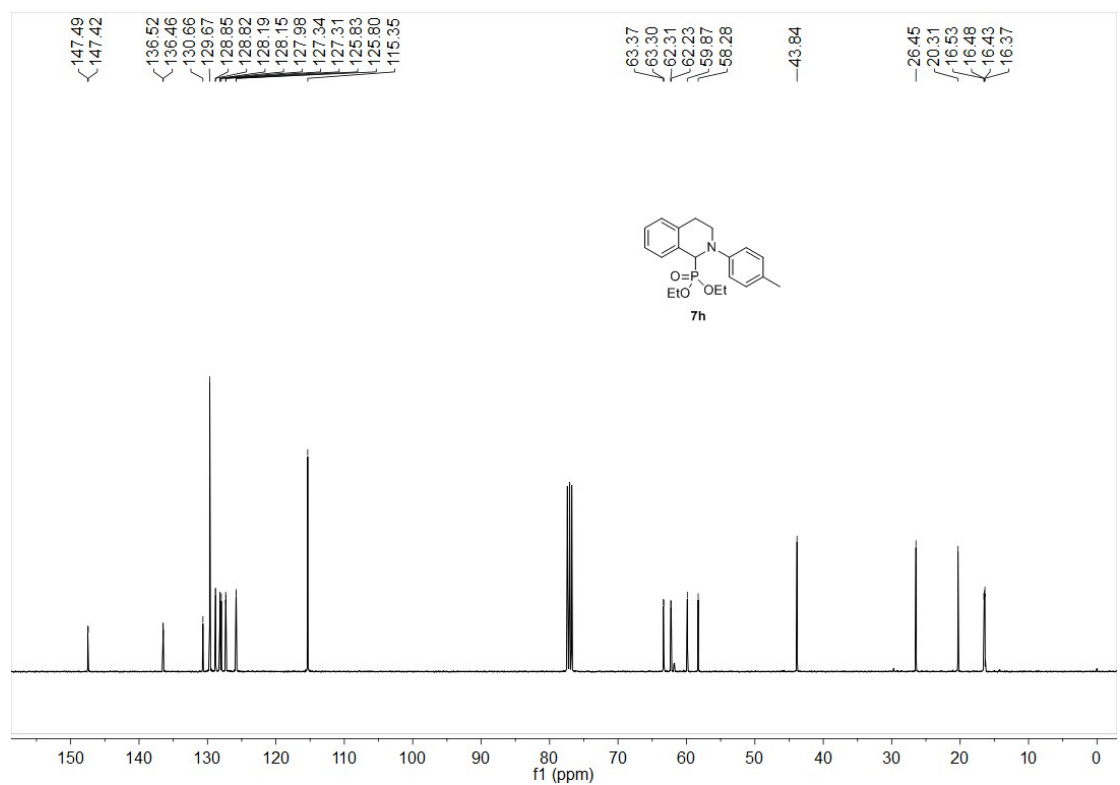

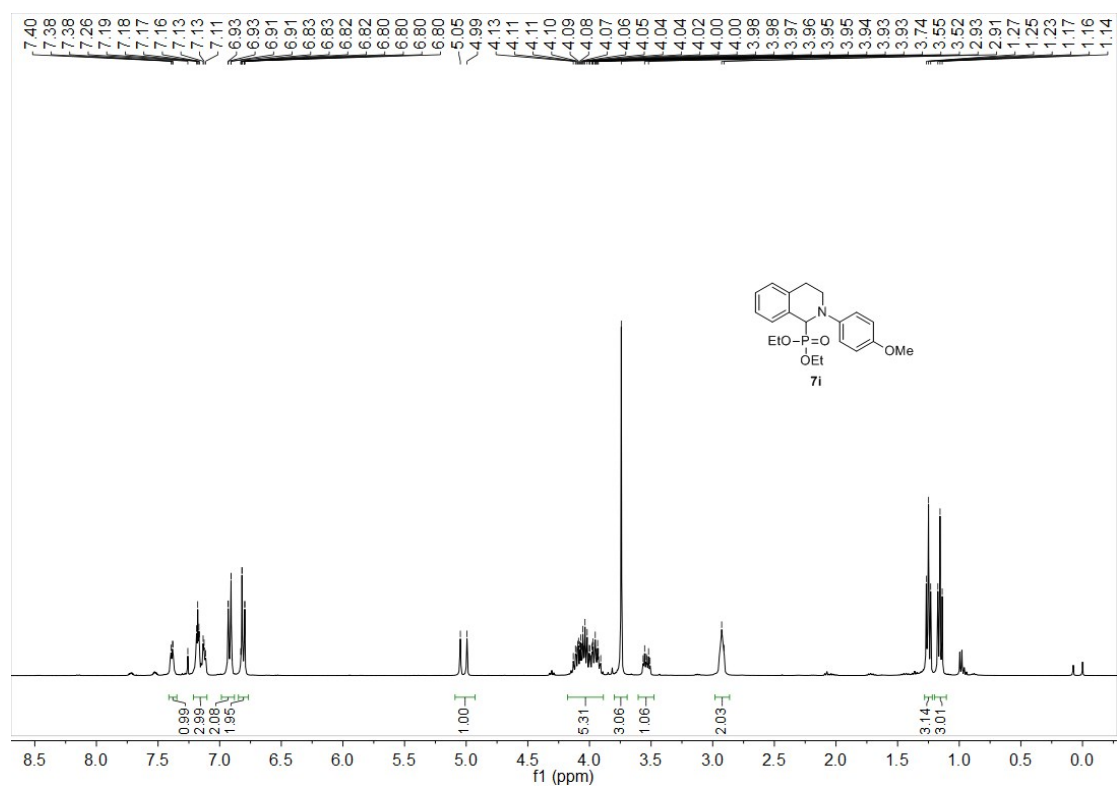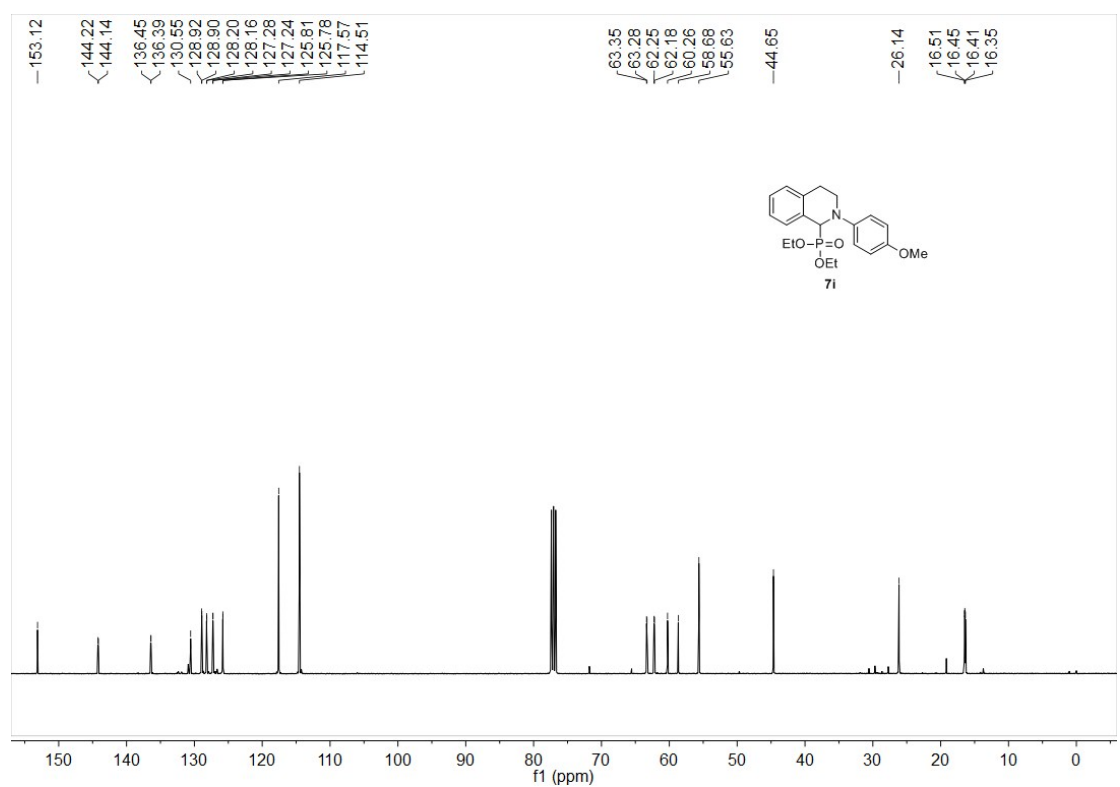

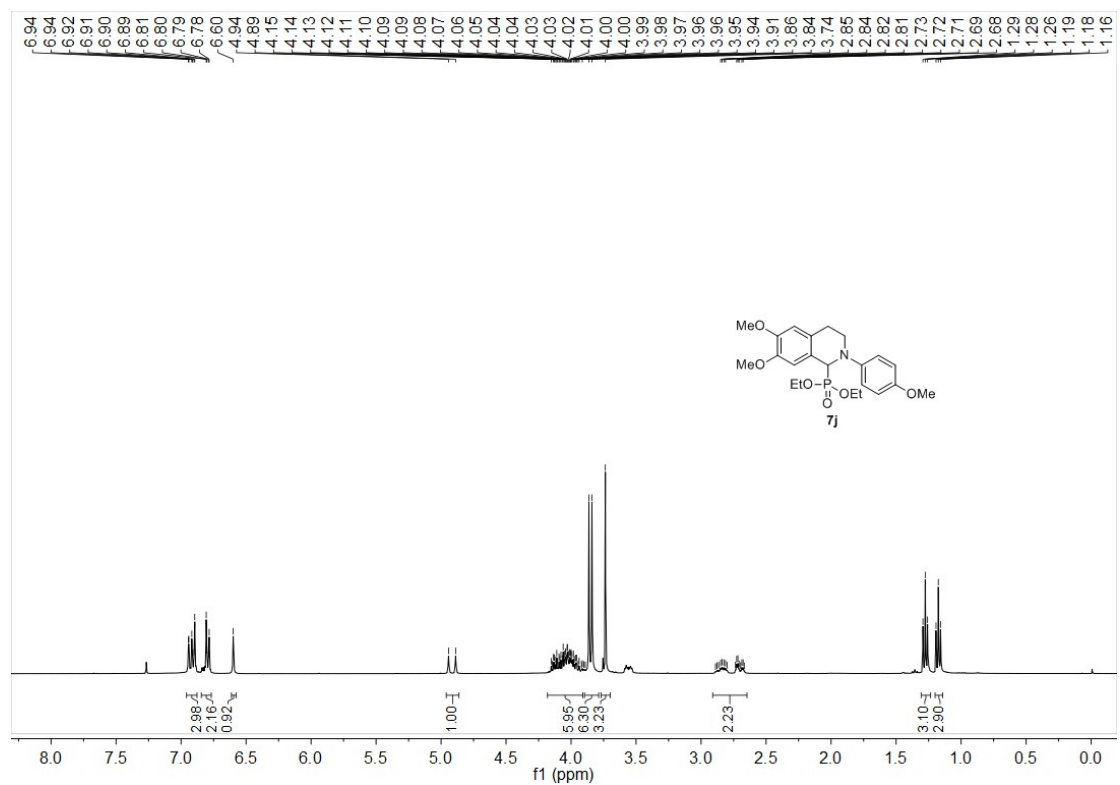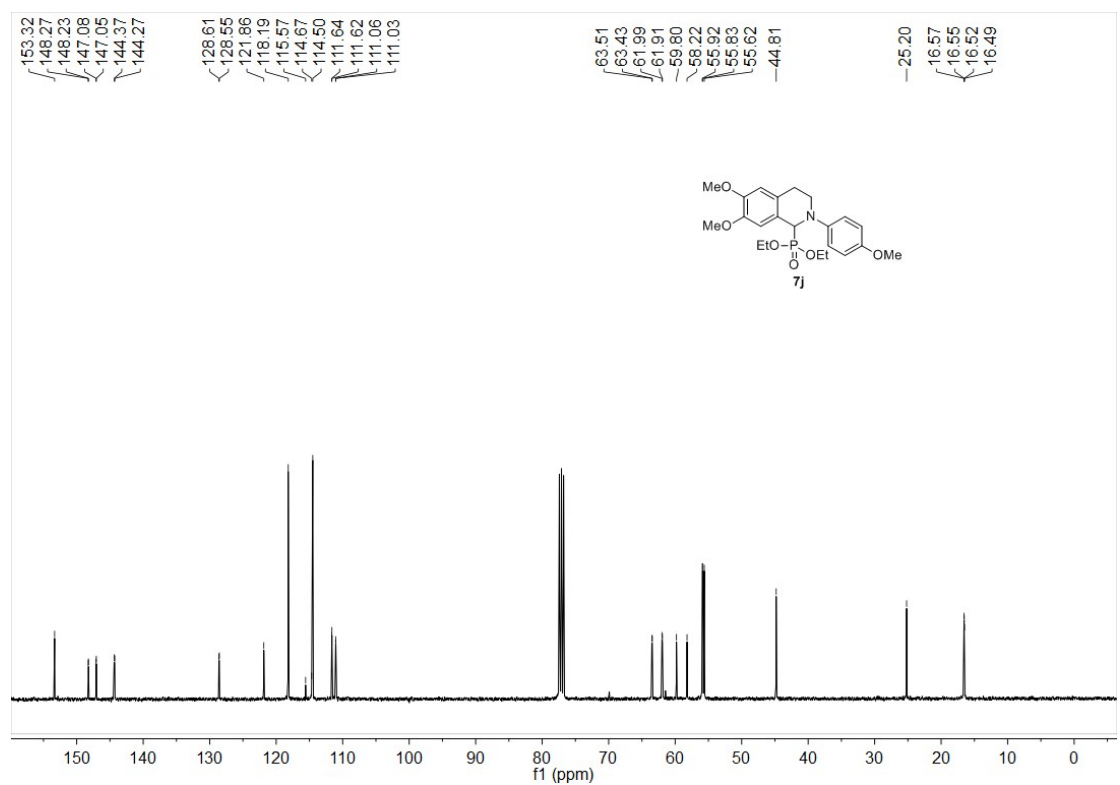

Supplement: c5cc03421c1.pdf [file c5cc03421c1.pdf]
